# Supplementary material for: Highly efficient hydrazination of conjugated nitroalkenes via imidazole or DMAP mediated Morita–Baylis–Hillman reaction
Source: Royal Society of Chemistry journal article supplement (doi:10.1039/b604899d), 2006-01-01
Supplement: b604899d_b.pdf [file b604899d_b.pdf]

Copies of NMR Spectra  
For

**Highly efficient hydrazination of conjugated nitroalkenes via imidazole or DMAP  
mediated Morita-Baylis-Hillman reaction**

**M. Dadwal,<sup>a</sup> S. M. Mobin,<sup>c</sup> I. N. N. Namboothiri<sup>a\*</sup>**

**Table of Contents**

|                                                                         | Page |
|-------------------------------------------------------------------------|------|
| 1 Figure S1. <sup>1</sup> H NMR Spectrum of <b>3a</b>                   | 3    |
| 2 Figure S2. <sup>13</sup> C NMR Spectrum of <b>3a</b>                  | 4    |
| 3 Figure S3. <sup>1</sup> H- <sup>1</sup> H NOESY Spectrum of <b>3a</b> | 5    |
| 4 Figure S4. <sup>1</sup> H NMR Spectrum of <b>3b</b>                   | 6    |
| 5 Figure S5. <sup>13</sup> C NMR Spectrum of <b>3b</b>                  | 7    |
| 6 Figure S6. <sup>1</sup> H NMR Spectrum of <b>3c</b>                   | 8    |
| 7 Figure S7. <sup>13</sup> C NMR Spectrum of <b>3c</b>                  | 9    |
| 8 Figure S8. <sup>1</sup> H NMR Spectrum of <b>3d</b>                   | 10   |
| 9 Figure S9. <sup>13</sup> C NMR Spectrum of <b>3d</b>                  | 11   |
| 10 Figure S10. <sup>1</sup> H NMR Spectrum of <b>3e</b>                 | 12   |
| 11 Figure S11. <sup>13</sup> C NMR Spectrum of <b>3e</b>                | 13   |
| 12 Figure S12. <sup>1</sup> H NMR Spectrum of <b>3f</b>                 | 14   |
| 13 Figure S13. <sup>13</sup> C NMR Spectrum of <b>3f</b>                | 15   |
| 14 Figure S14. <sup>1</sup> H NMR Spectrum of <b>3g</b>                 | 16   |
| 15 Figure S15. <sup>13</sup> C NMR Spectrum of <b>3g</b>                | 17   |
| 16 Figure S16. <sup>1</sup> H NMR Spectrum of <b>3h</b>                 | 18   |
| 17 Figure S17. <sup>13</sup> C NMR Spectrum of <b>3h</b>                | 19   |
| 18 Figure S18. <sup>1</sup> H NMR Spectrum of <b>3i</b>                 | 20   |
| 19 Figure S19. <sup>13</sup> C NMR Spectrum of <b>3i</b>                | 21   |
| 20 Figure S20. <sup>1</sup> H NMR Spectrum of <b>3j</b>                 | 22   |
| 21 Figure S21. <sup>13</sup> C NMR Spectrum of <b>3j</b>                | 23   |
| 22 Figure S22. <sup>1</sup> H NMR Spectrum of <b>3k</b>                 | 24   |
| 23 Figure S23. <sup>13</sup> C NMR Spectrum of <b>3k</b>                | 25   |
| 24 Figure S24. <sup>1</sup> H NMR Spectrum of <b>3l</b>                 | 26   |
| 25 Figure S25. <sup>13</sup> C NMR Spectrum of <b>3l</b>                | 27   |
| 26 Figure S26. <sup>1</sup> H NMR Spectrum of <b>3m</b>                 | 28   |
| 27 Figure S27. <sup>13</sup> C NMR Spectrum of <b>3m</b>                | 29   |
| 28 Figure S28. <sup>1</sup> H NMR Spectrum of <b>7a</b>                 | 30   |
| 29 Figure S29. <sup>13</sup> C NMR Spectrum of <b>7a</b>                | 31   |
| 30 Figure S30. <sup>1</sup> H NMR Spectrum of <b>7f</b>                 | 32   |
| 31 Figure S31. <sup>13</sup> C NMR Spectrum of <b>7f</b>                | 33   |
| 32 Figure S32. <sup>1</sup> H NMR Spectrum of <b>9</b>                  | 34   |
| 33 Figure S33. <sup>13</sup> C NMR Spectrum of <b>9</b>                 | 35   |
| 34 Figure S34. <sup>1</sup> H NMR Spectrum of <b>12</b>                 | 36   |
| 35 Figure S35. <sup>13</sup> C NMR Spectrum of <b>12</b>                | 37   |
| 36 Figure S36. <sup>1</sup> H NMR Spectrum of <b>3f</b> (-40 °C)        | 38   |
| 37 Figure S37. <sup>1</sup> H NMR Spectrum of <b>3f</b> (-25 °C)        | 39   |
| 38 Figure S38. <sup>1</sup> H NMR Spectrum of <b>3f</b> (-10 °C)        | 40   |
| 39 Figure S39. <sup>1</sup> H NMR Spectrum of <b>3f</b> (-0 °C)         | 41   |

---

|    |                                                                |    |
|----|----------------------------------------------------------------|----|
| 40 | Figure S40. $^1\text{H}$ NMR Spectrum of <b>3f</b> (10 °C)     | 42 |
| 41 | Figure S41. $^1\text{H}$ NMR Spectrum of <b>3f</b> (rt, 25 °C) | 43 |
| 42 | Figure S42. $^1\text{H}$ NMR Spectrum of <b>3f</b> (35 °C)     | 44 |
| 43 | Figure S43. $^1\text{H}$ NMR Spectrum of <b>3f</b> (45 °C)     | 45 |
| 44 | Figure S44. $^1\text{H}$ NMR Spectrum of <b>3f</b> (+55 °C)    | 46 |

---

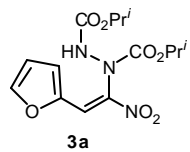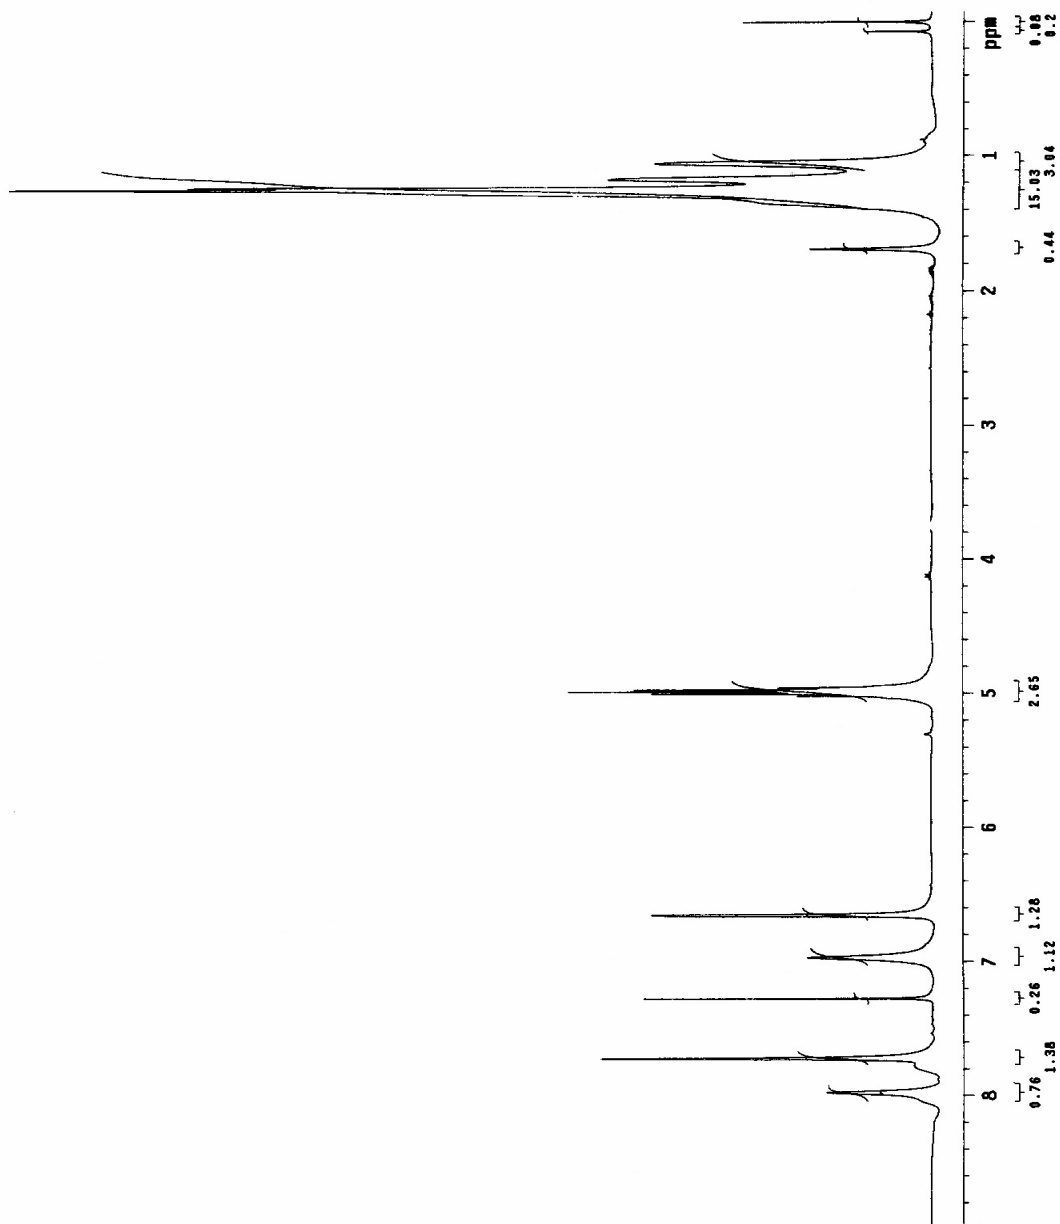

Figure S1. <sup>1</sup>H NMR Spectrum of 3a

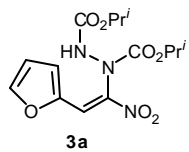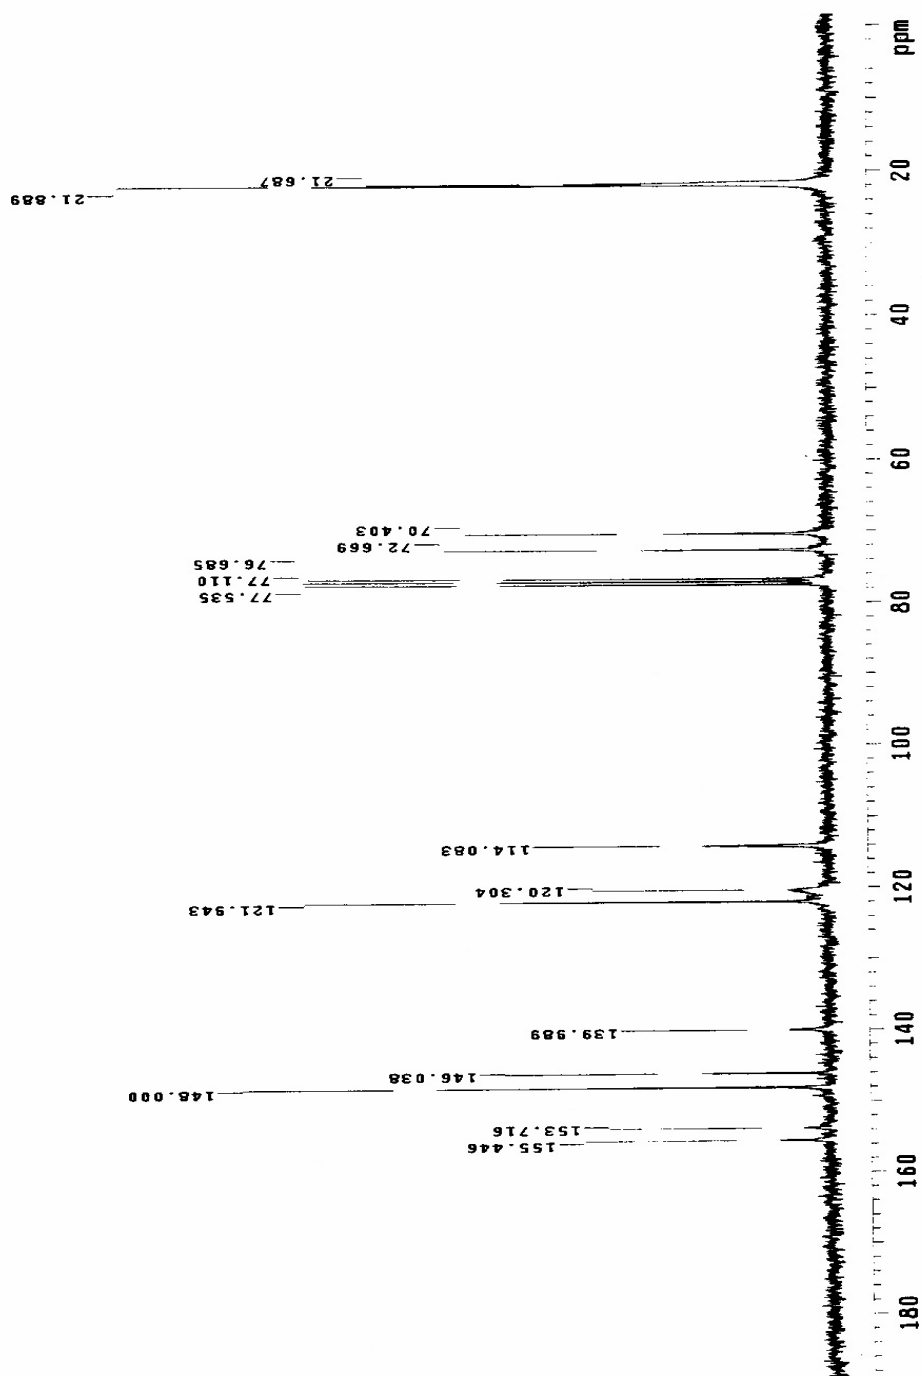

Figure S2. <sup>13</sup>C NMR Spectrum of 3a

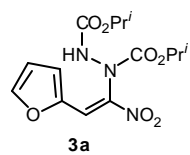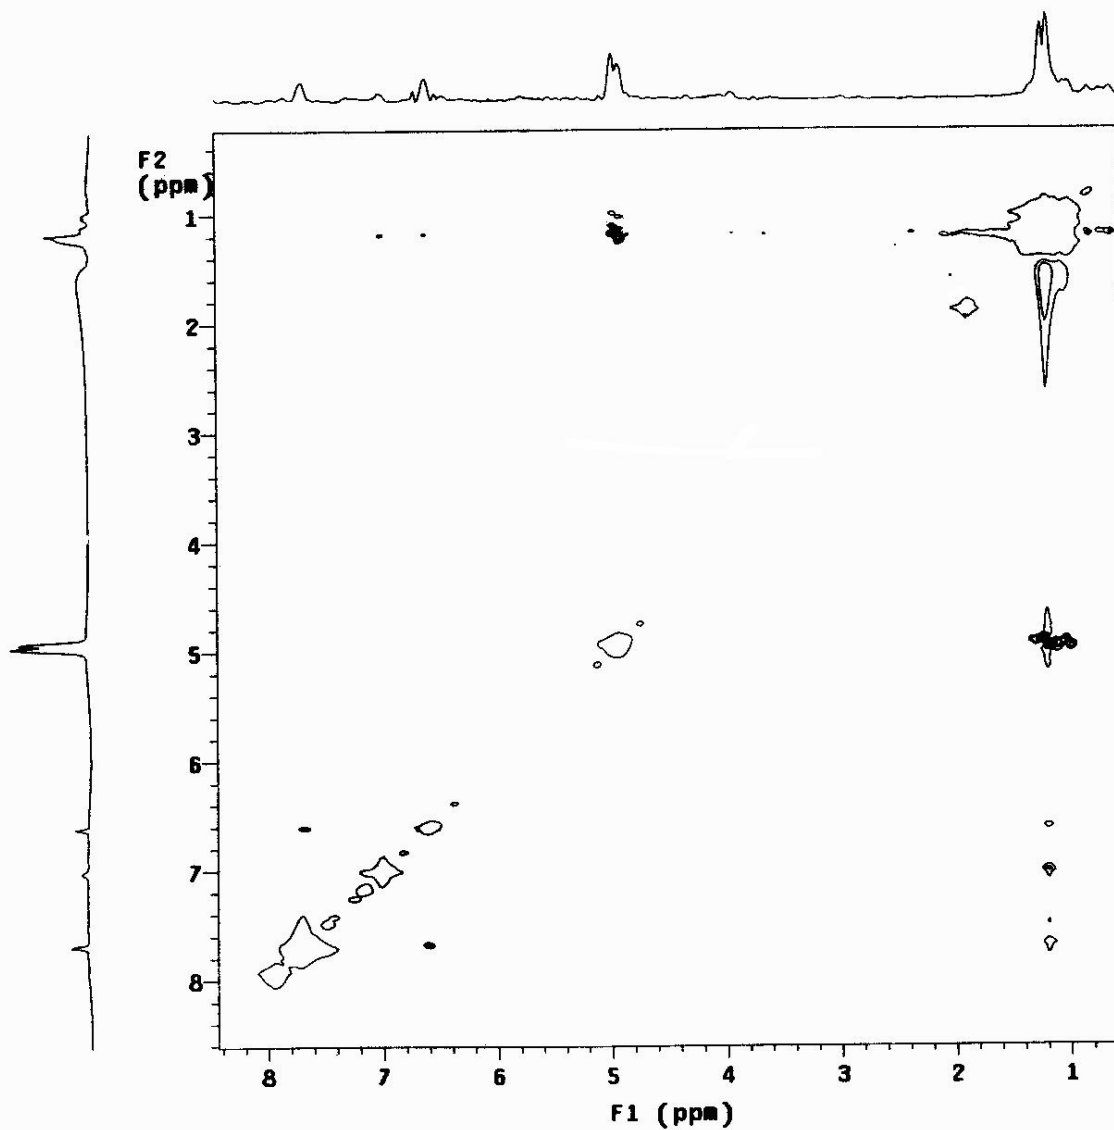

Figure S3.  $^1\text{H}$ - $^1\text{H}$  NOESY Spectrum of 3a

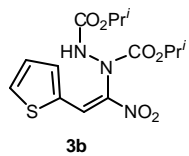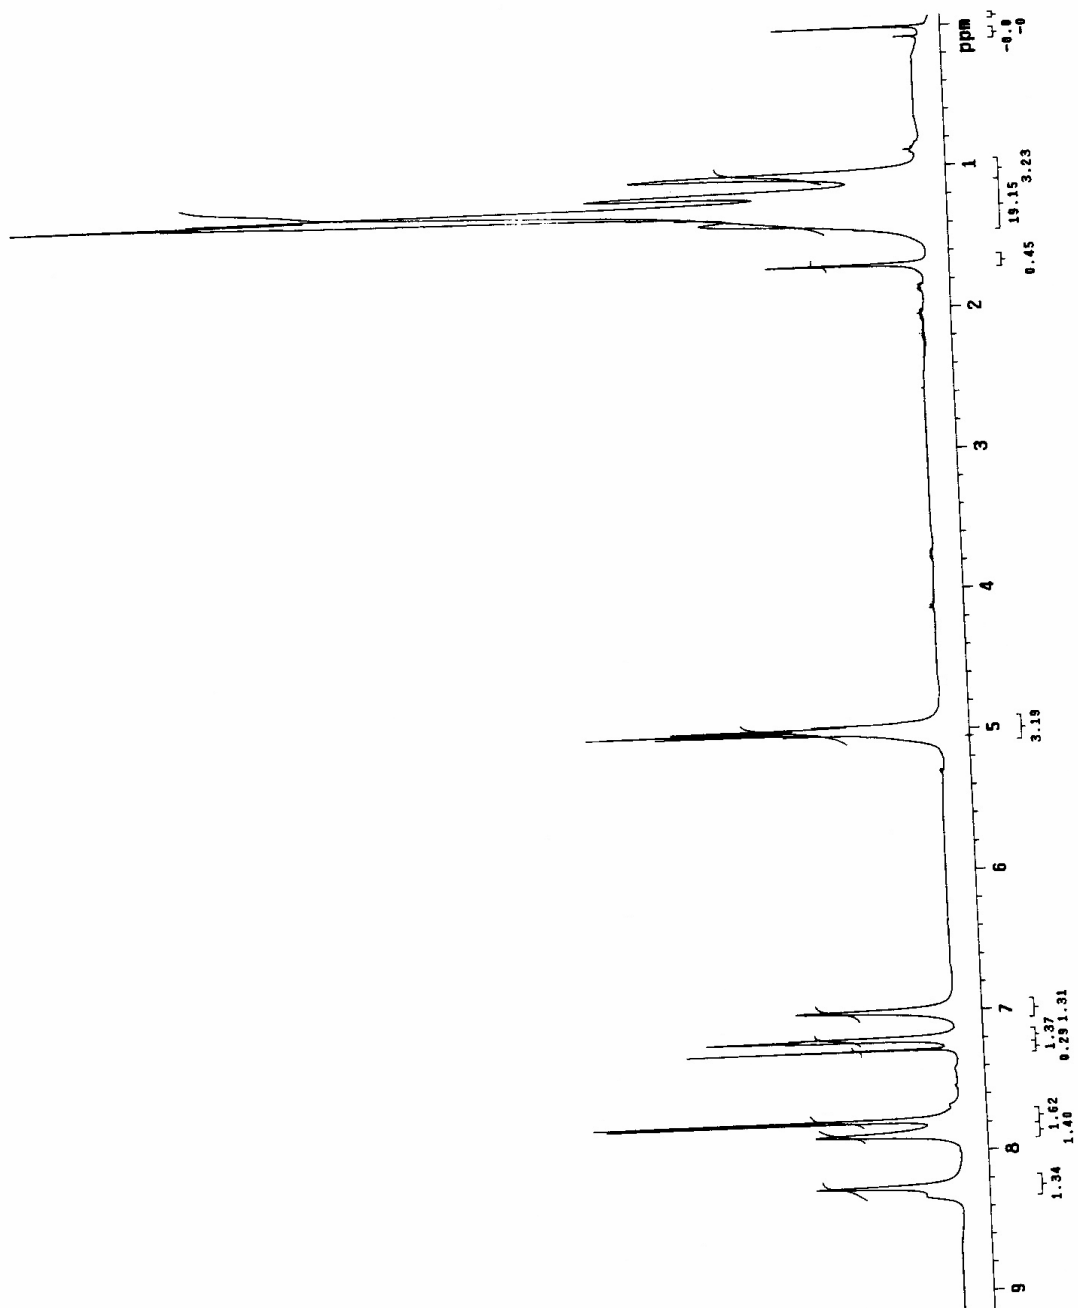

**Figure S4.** <sup>1</sup>H NMR Spectrum of **3b**

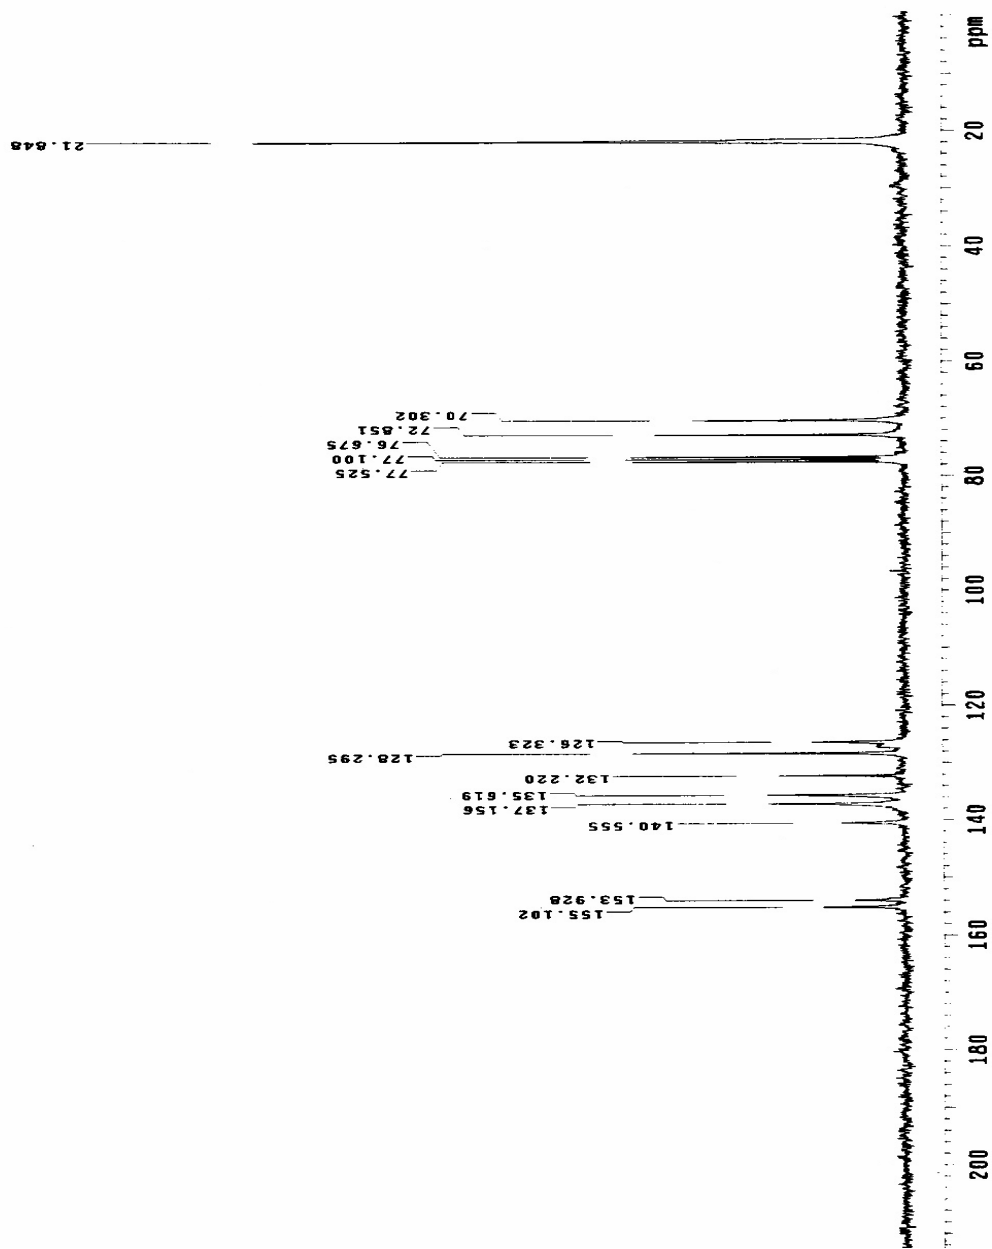

Figure S5. <sup>13</sup>C NMR Spectrum of 3b

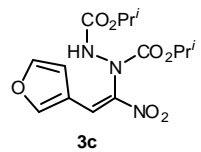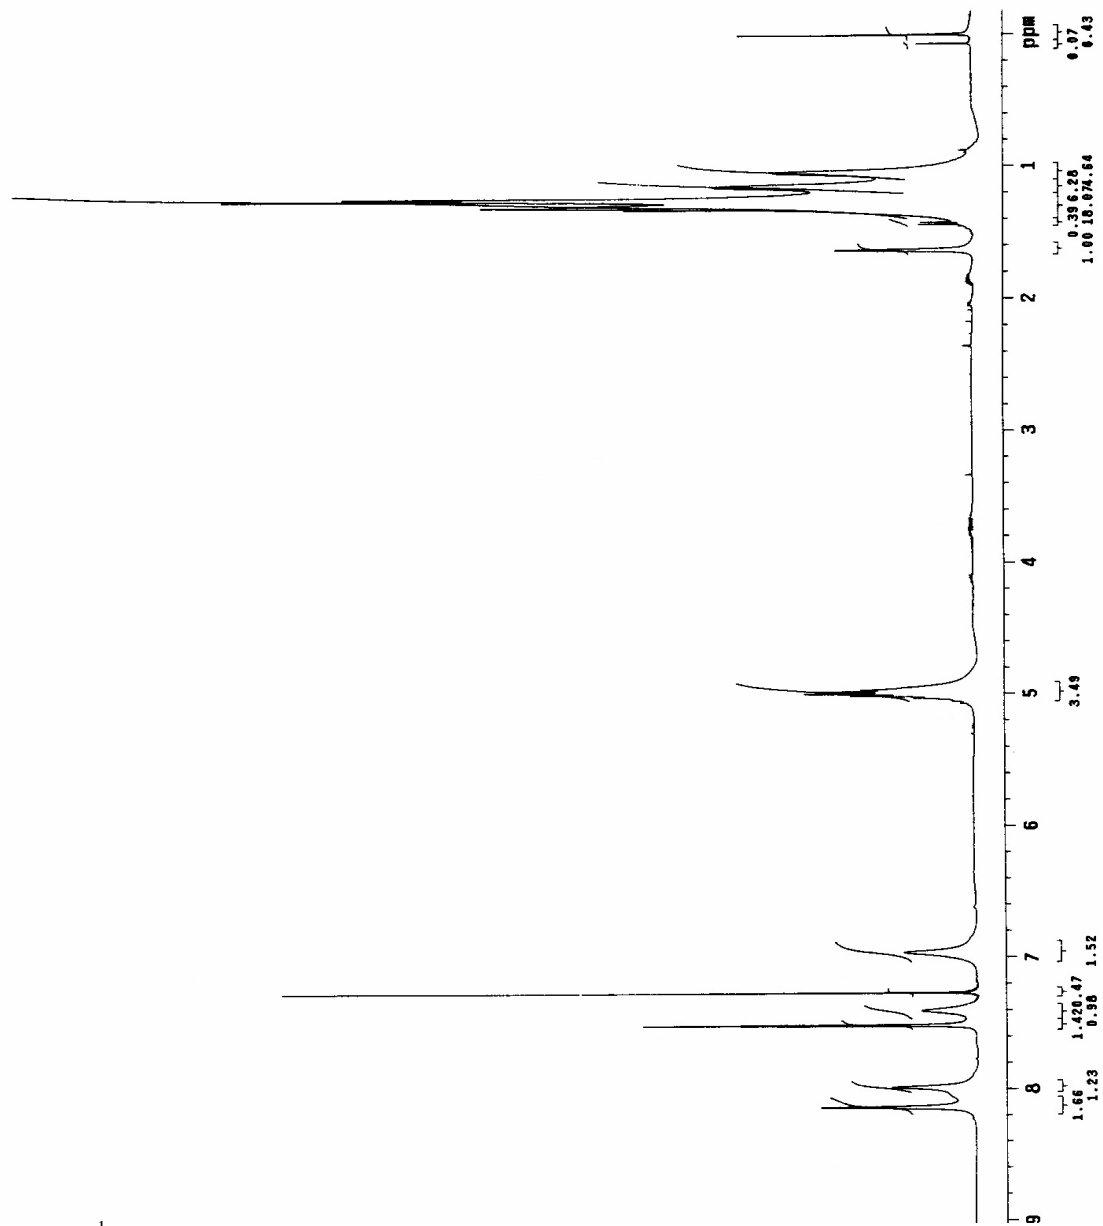

**Figure S6.**  $^1\text{H}$  NMR Spectrum of **3c**



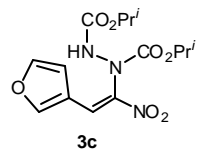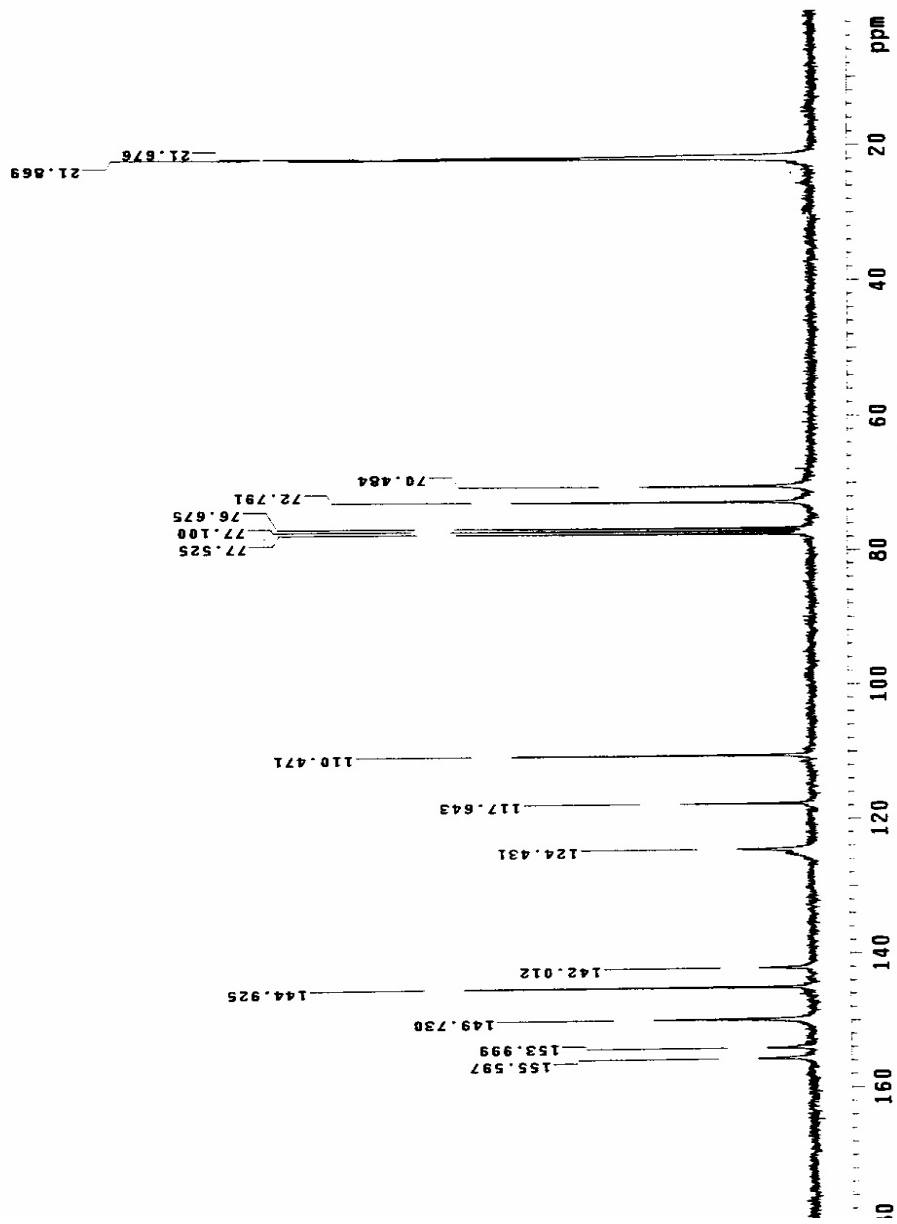

Figure S7. <sup>13</sup>C NMR Spectrum of 3c

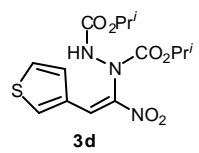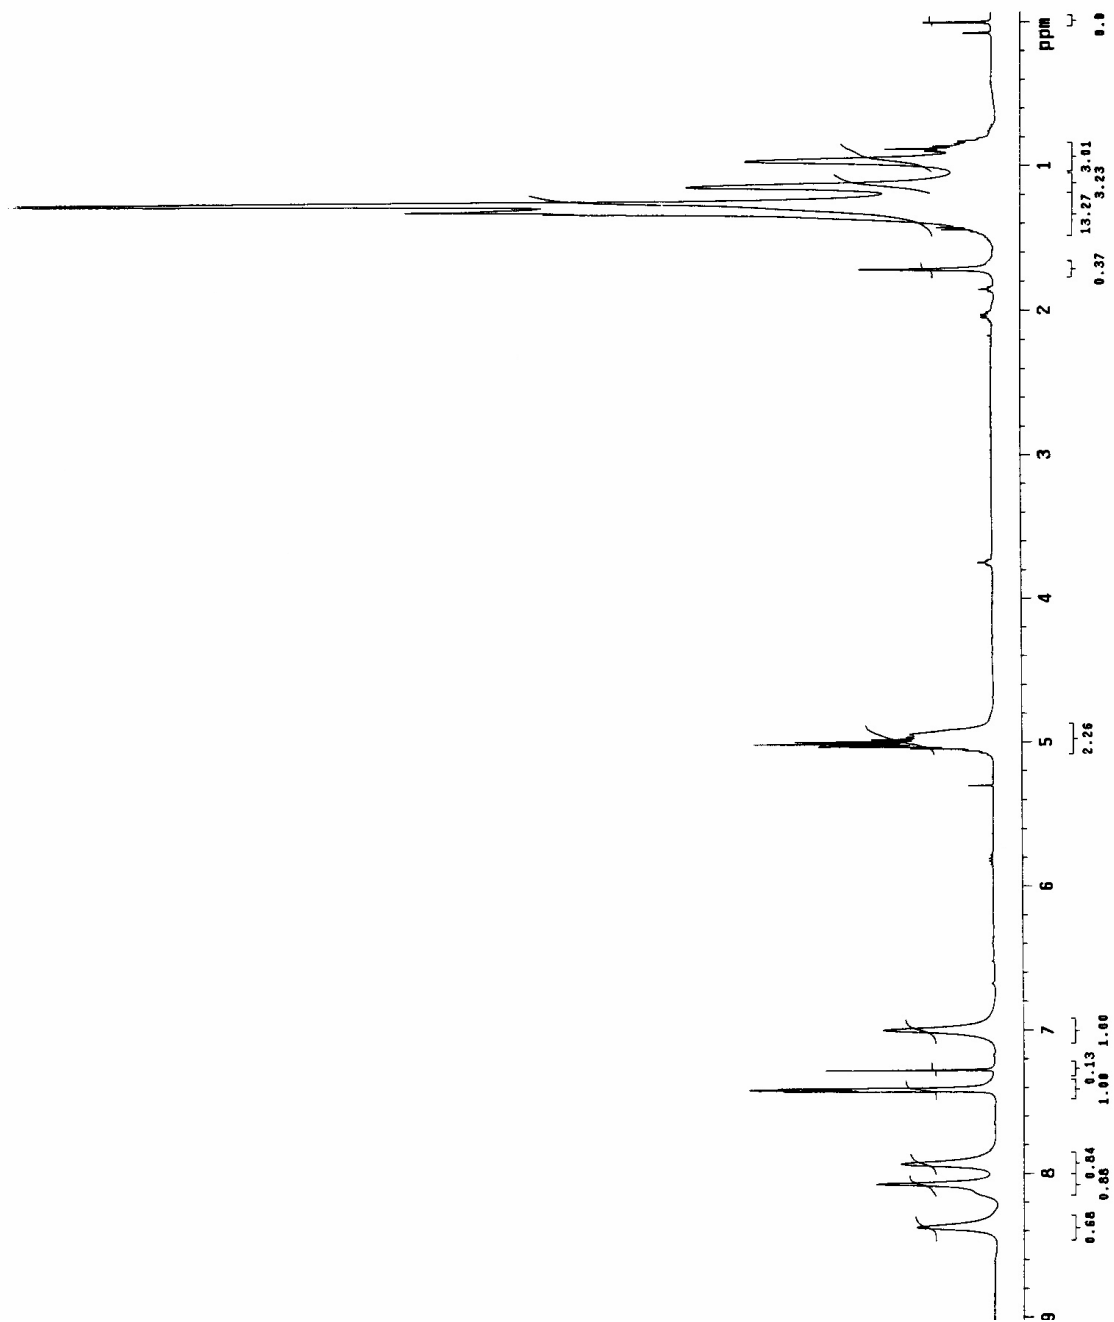

**Figure S8.** <sup>1</sup>H NMR Spectrum of **3d**

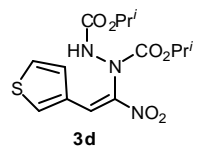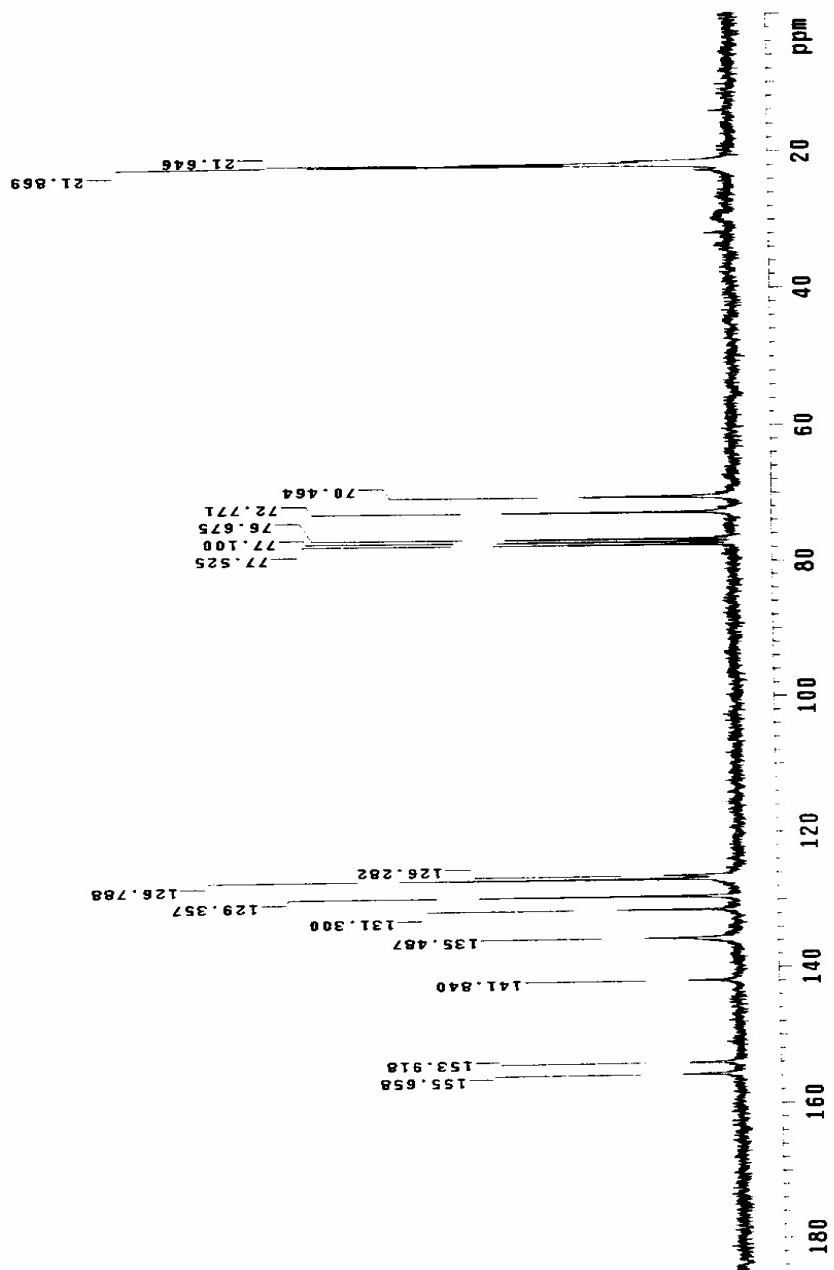

Figure S9. <sup>13</sup>C NMR Spectrum of 3d

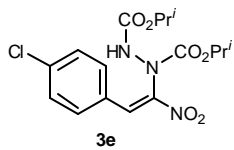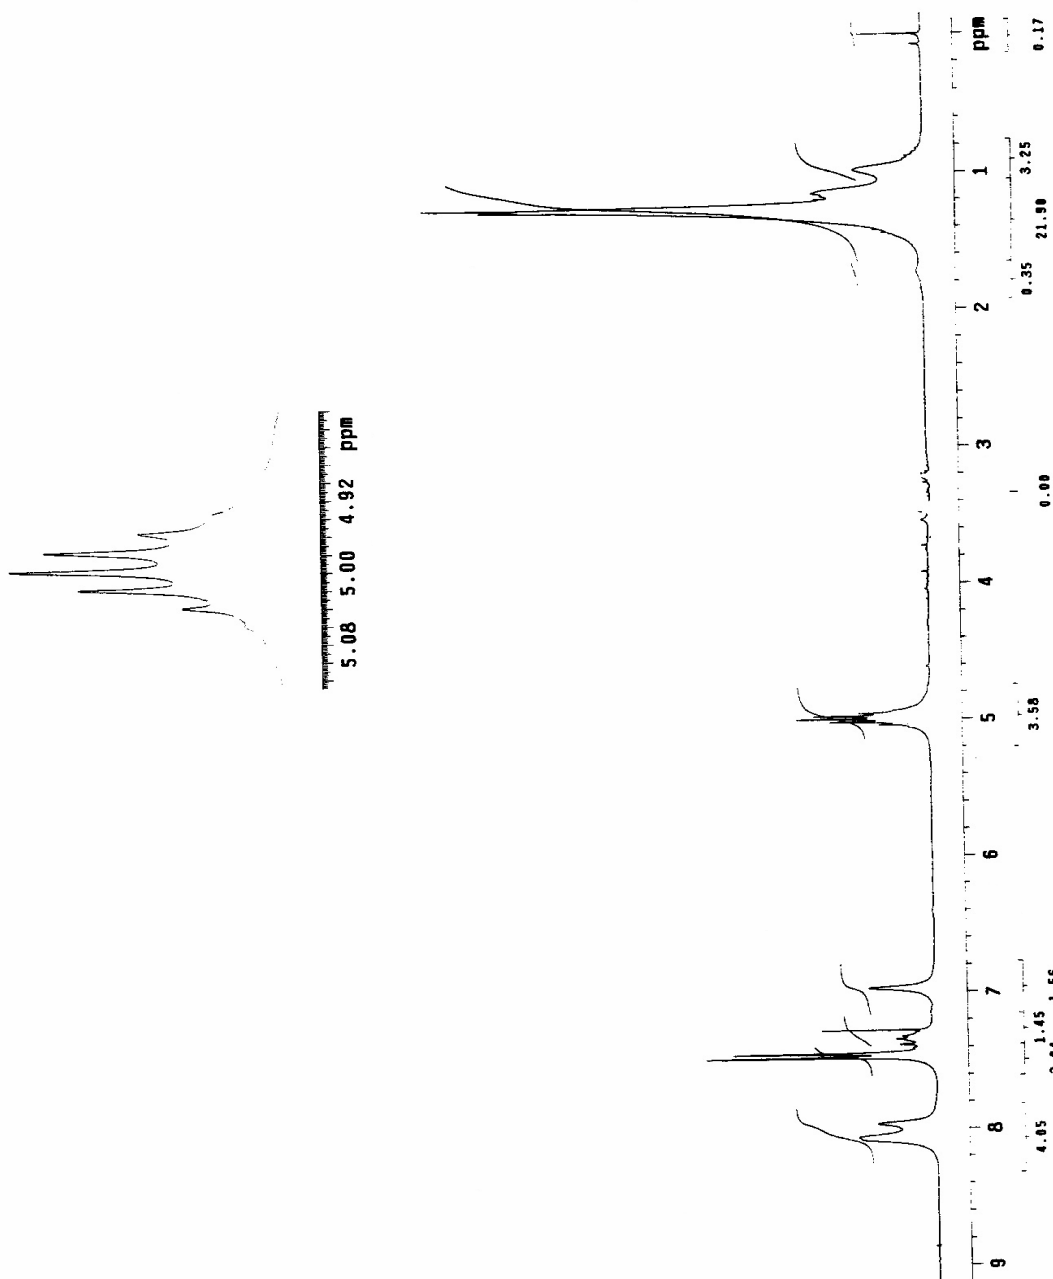

Figure S10. <sup>1</sup>H NMR Spectrum of 3e

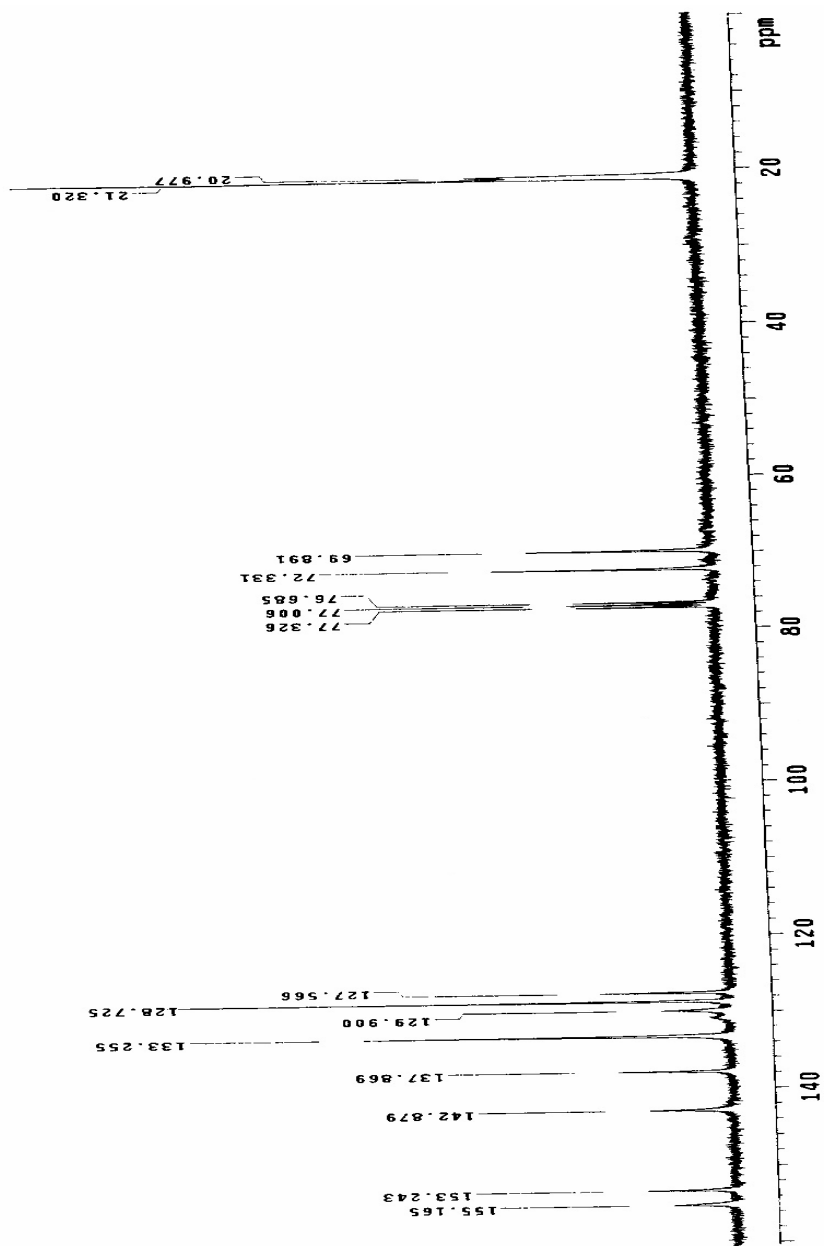

Figure S11.  $^{13}\text{C}$  NMR Spectrum of **3e**

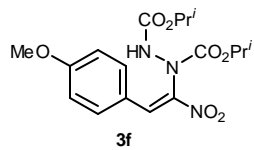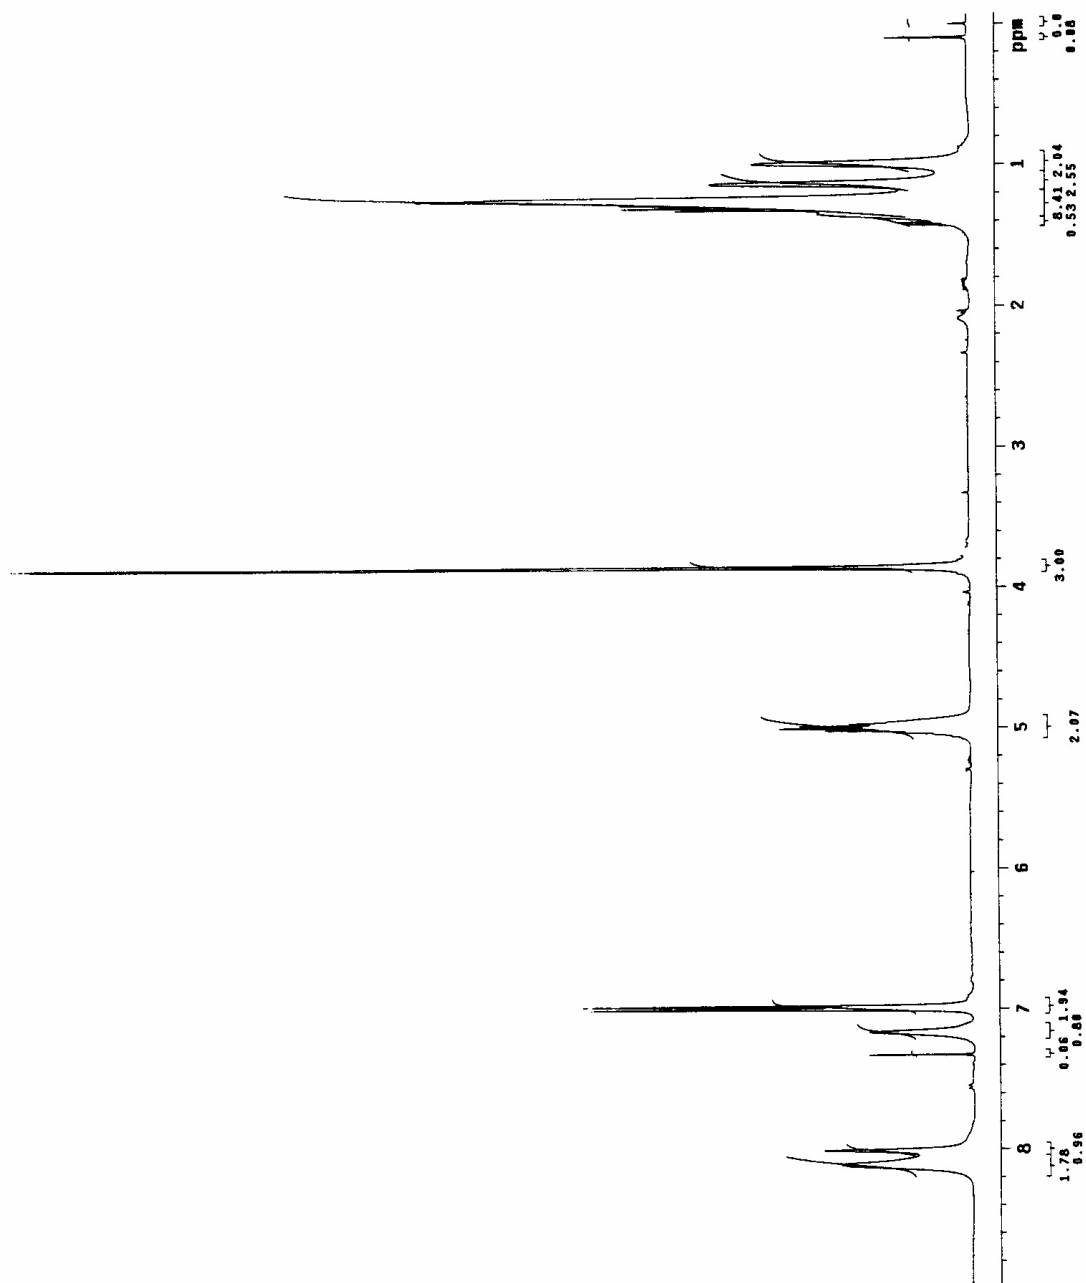

Figure S12.  $^1\text{H}$  NMR Spectrum of **3f**

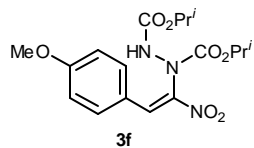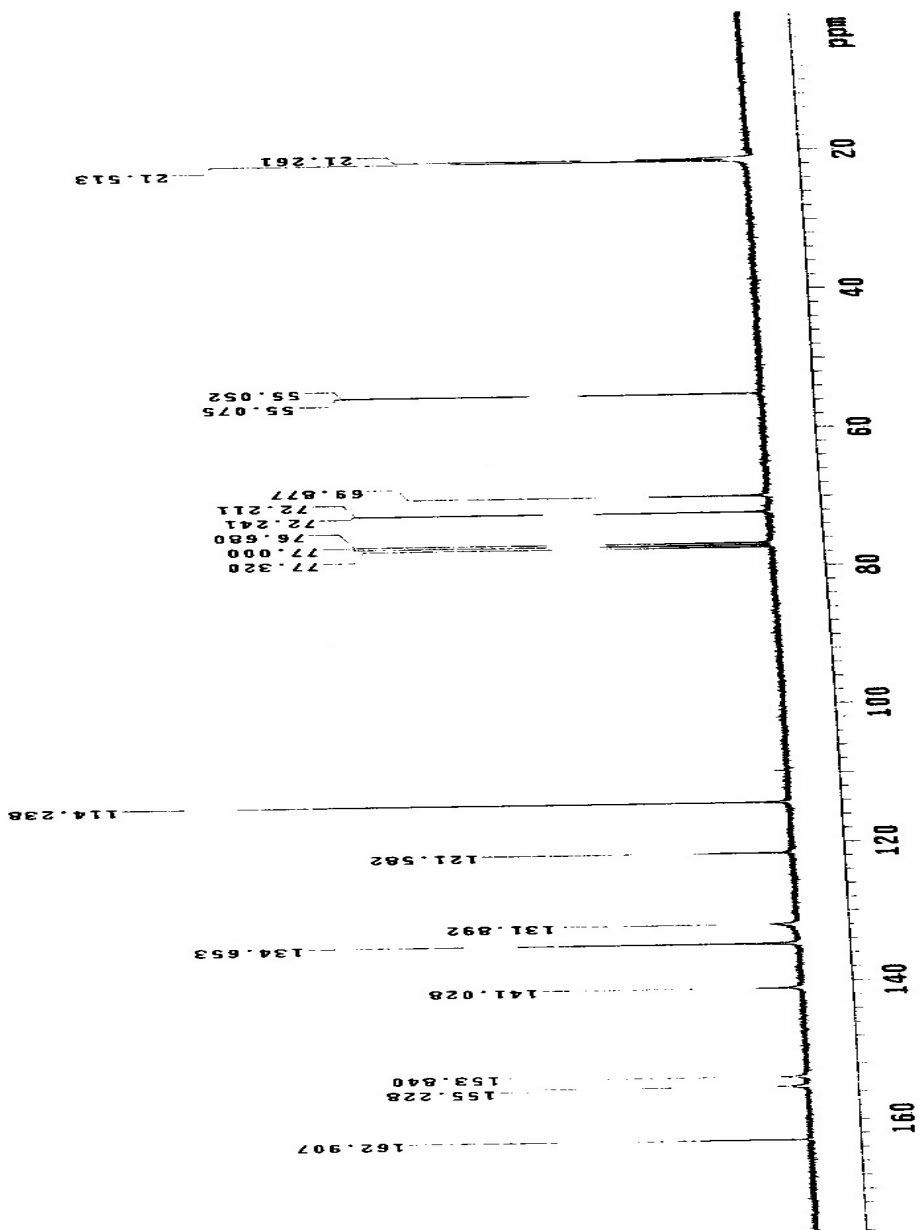

Figure S13. <sup>13</sup>C NMR Spectrum of 3f

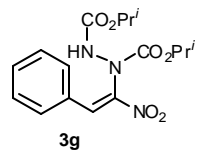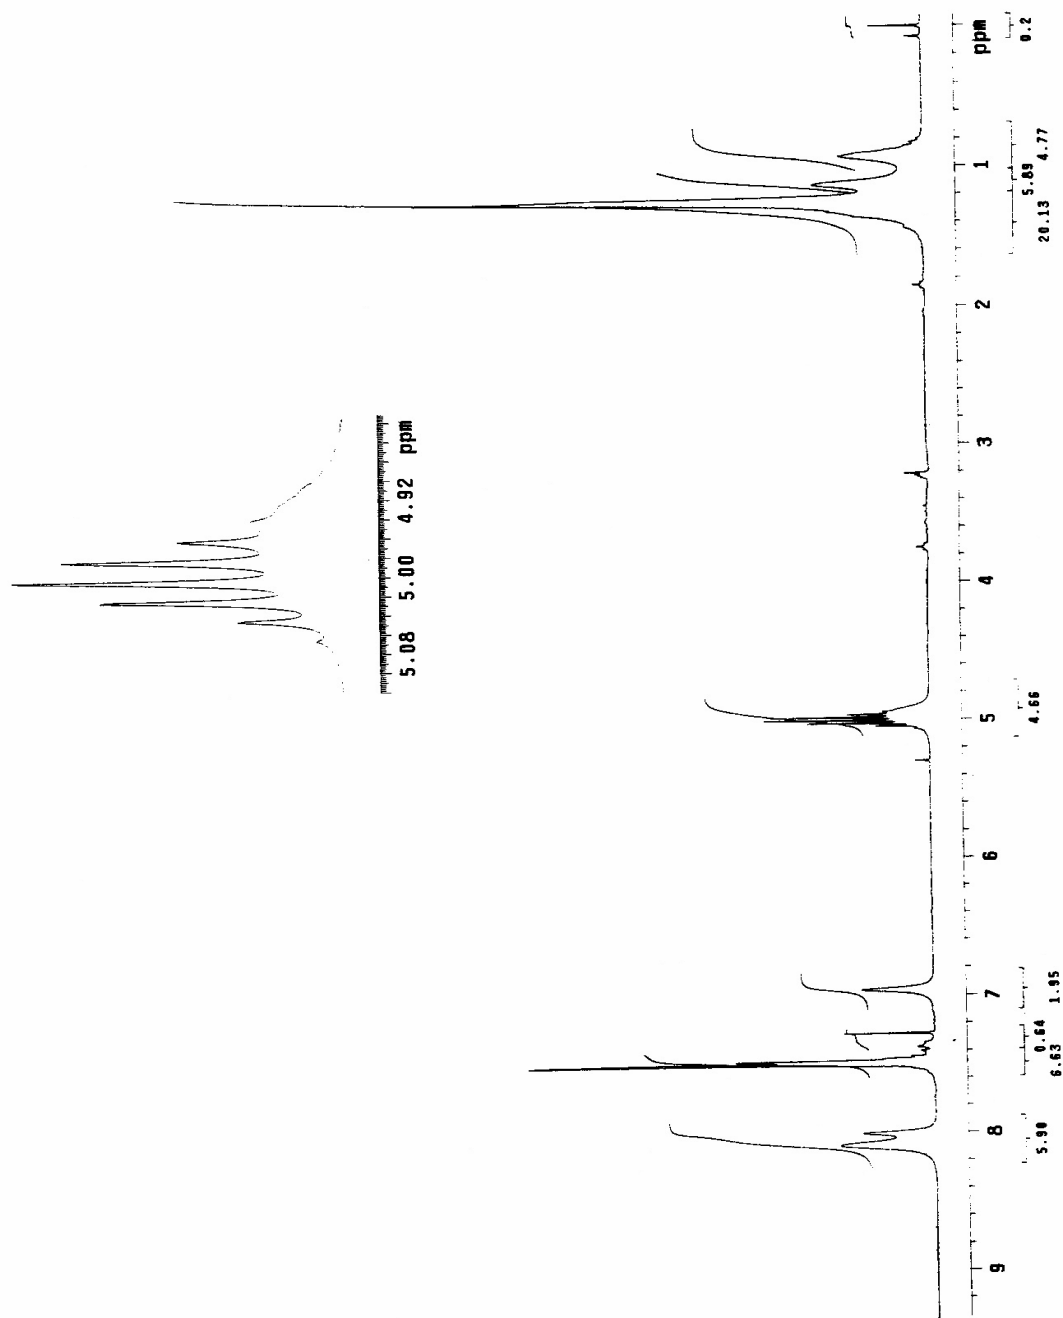

Figure S14. <sup>1</sup>H NMR Spectrum of 3g



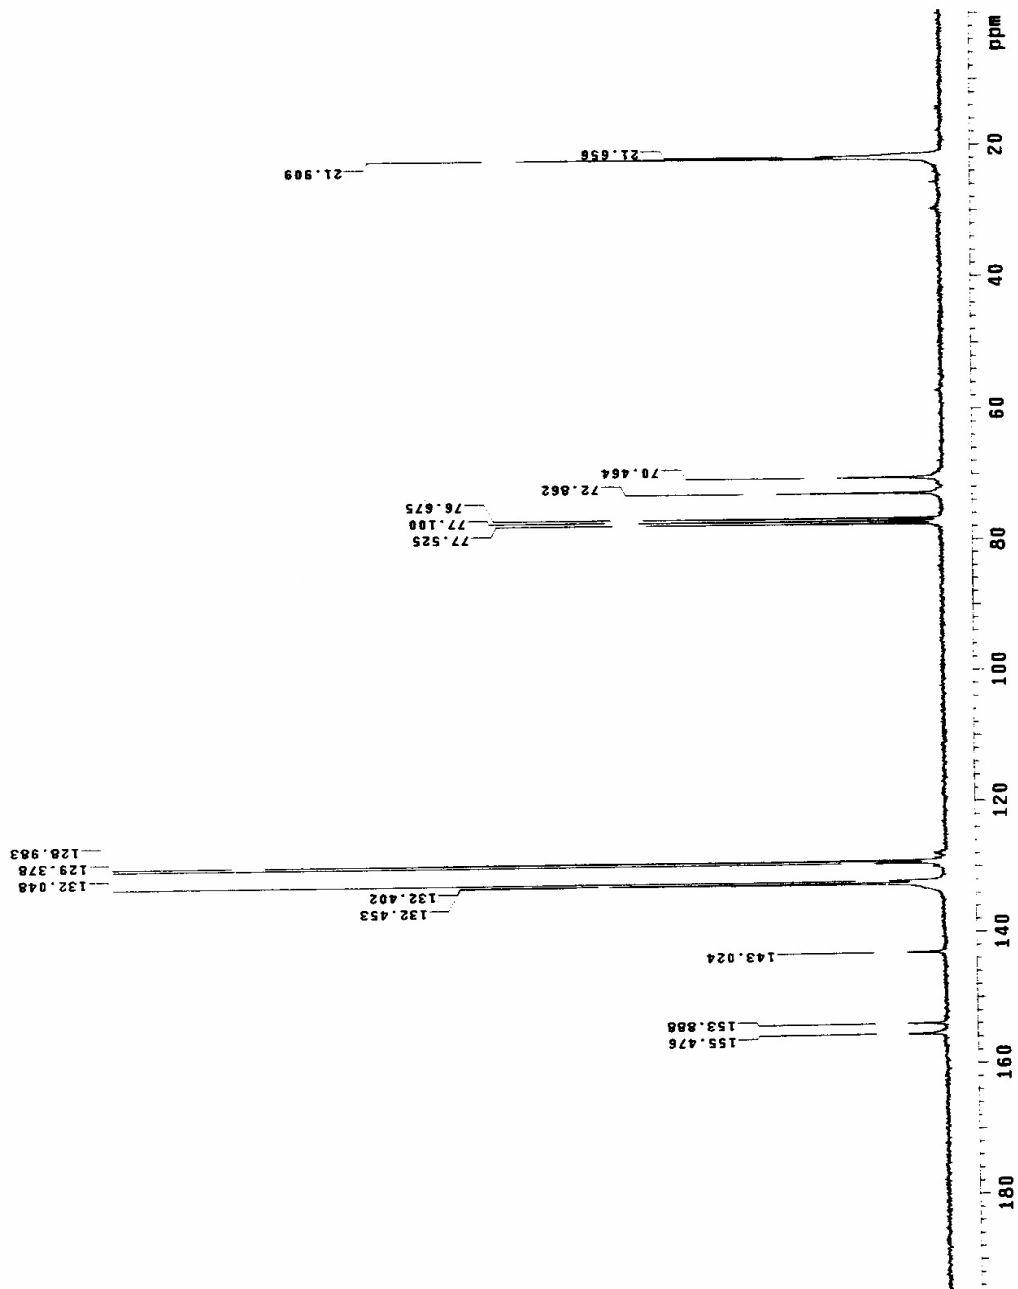

Figure S15. <sup>13</sup>C NMR Spectrum of 3g

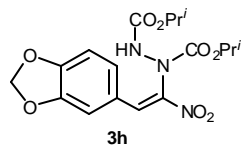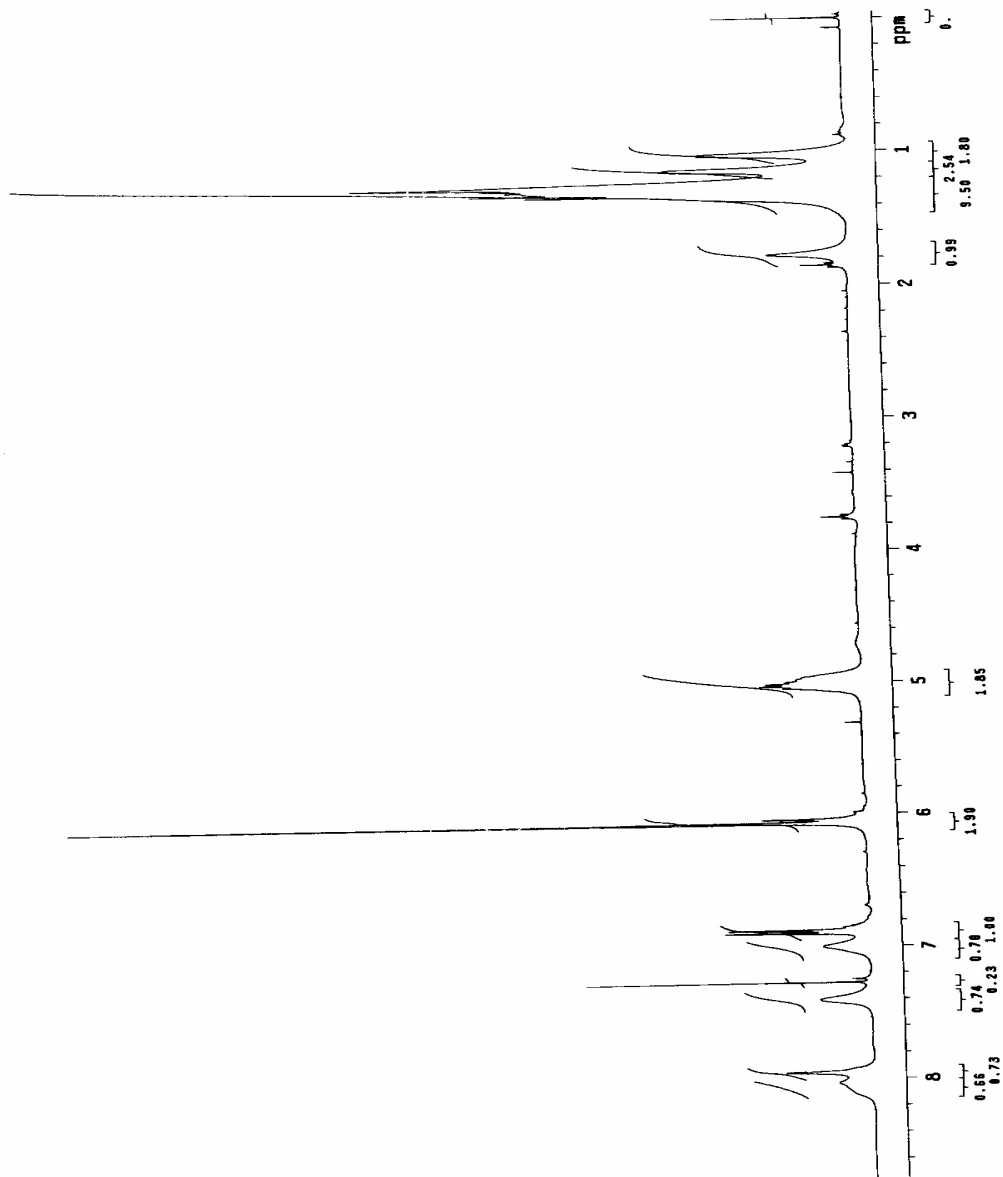

Figure S16. <sup>1</sup>H NMR Spectrum of 3h

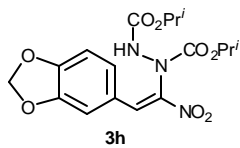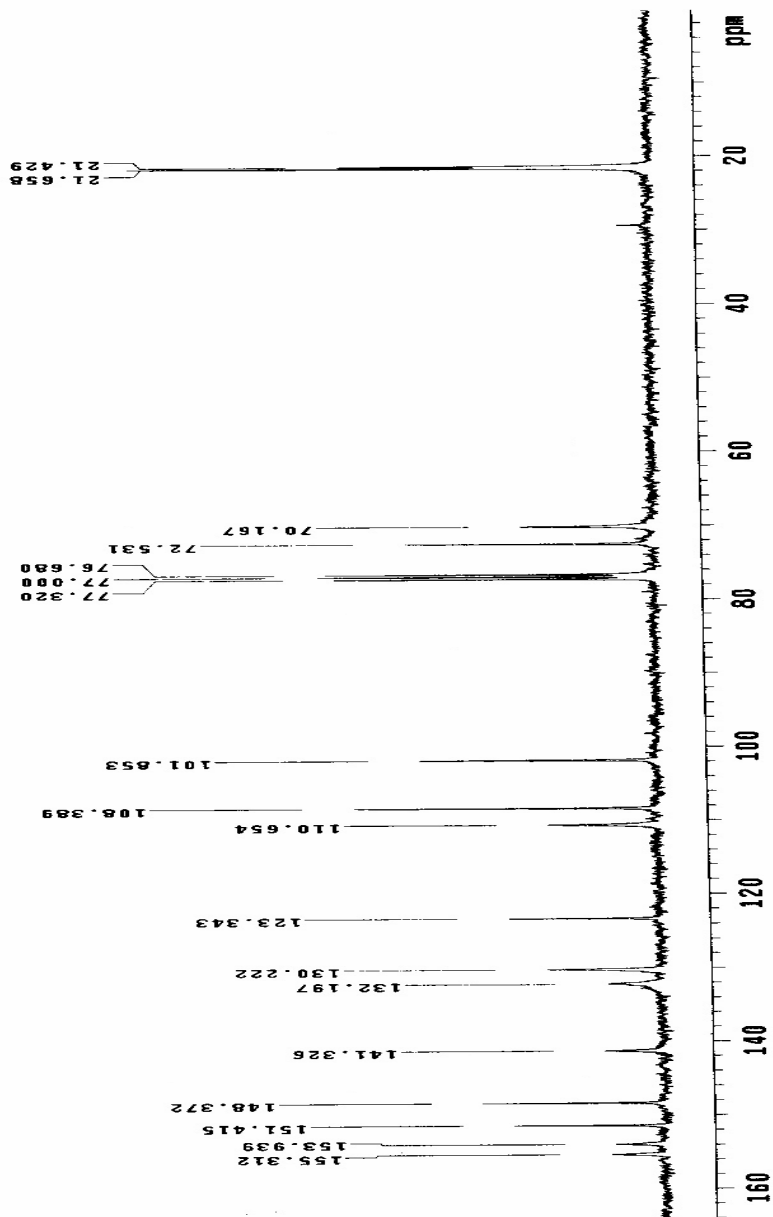

Figure S17. <sup>13</sup>C NMR Spectrum of 3h

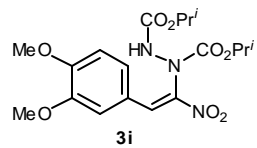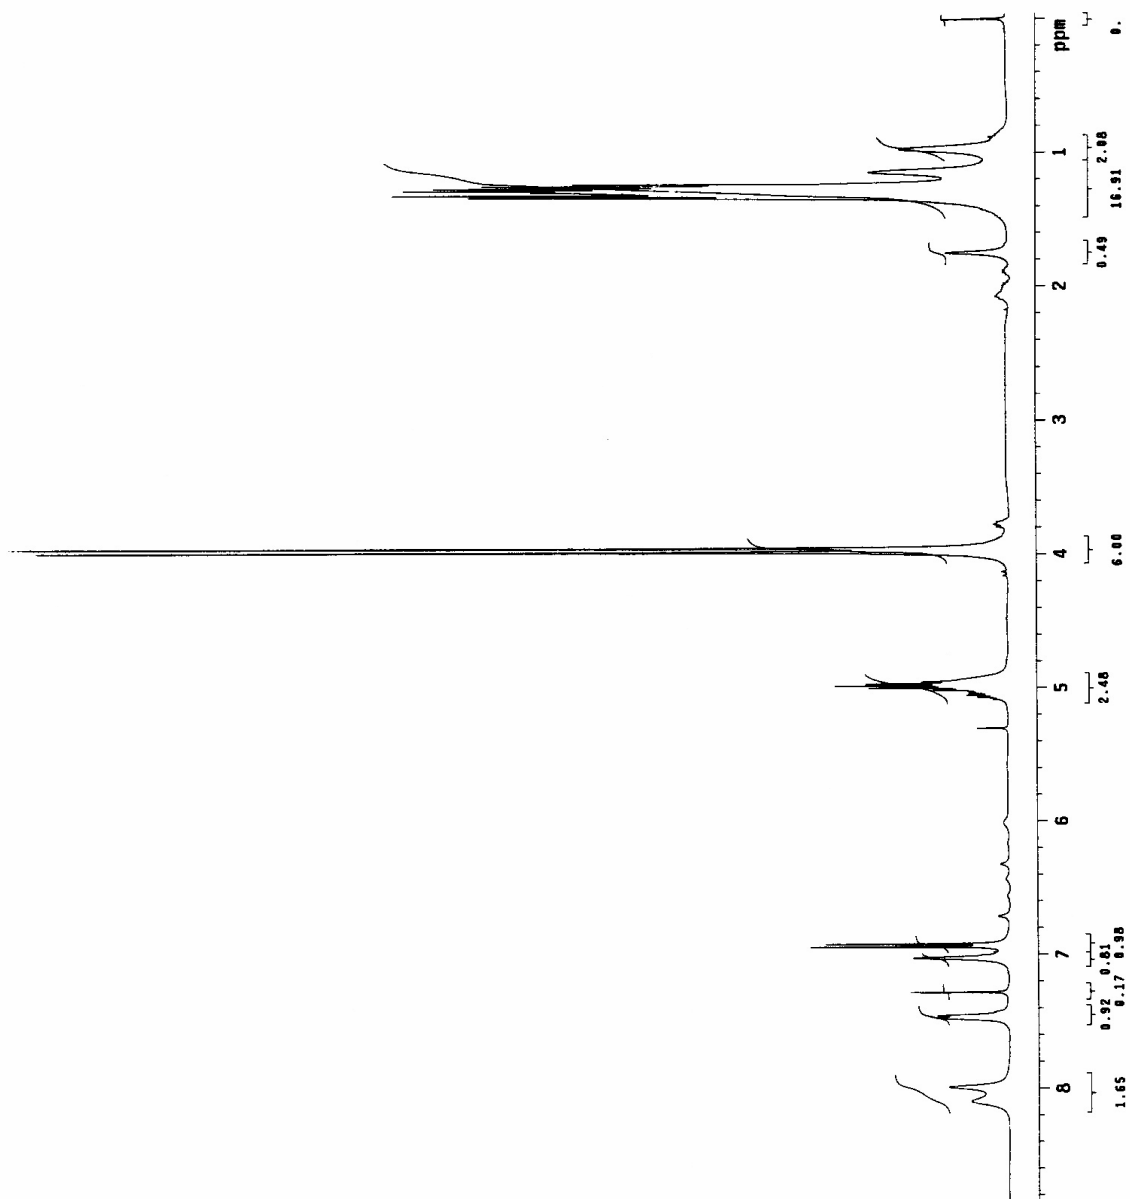

Figure S18. <sup>1</sup>H NMR Spectrum of 3i

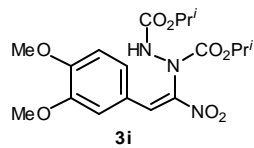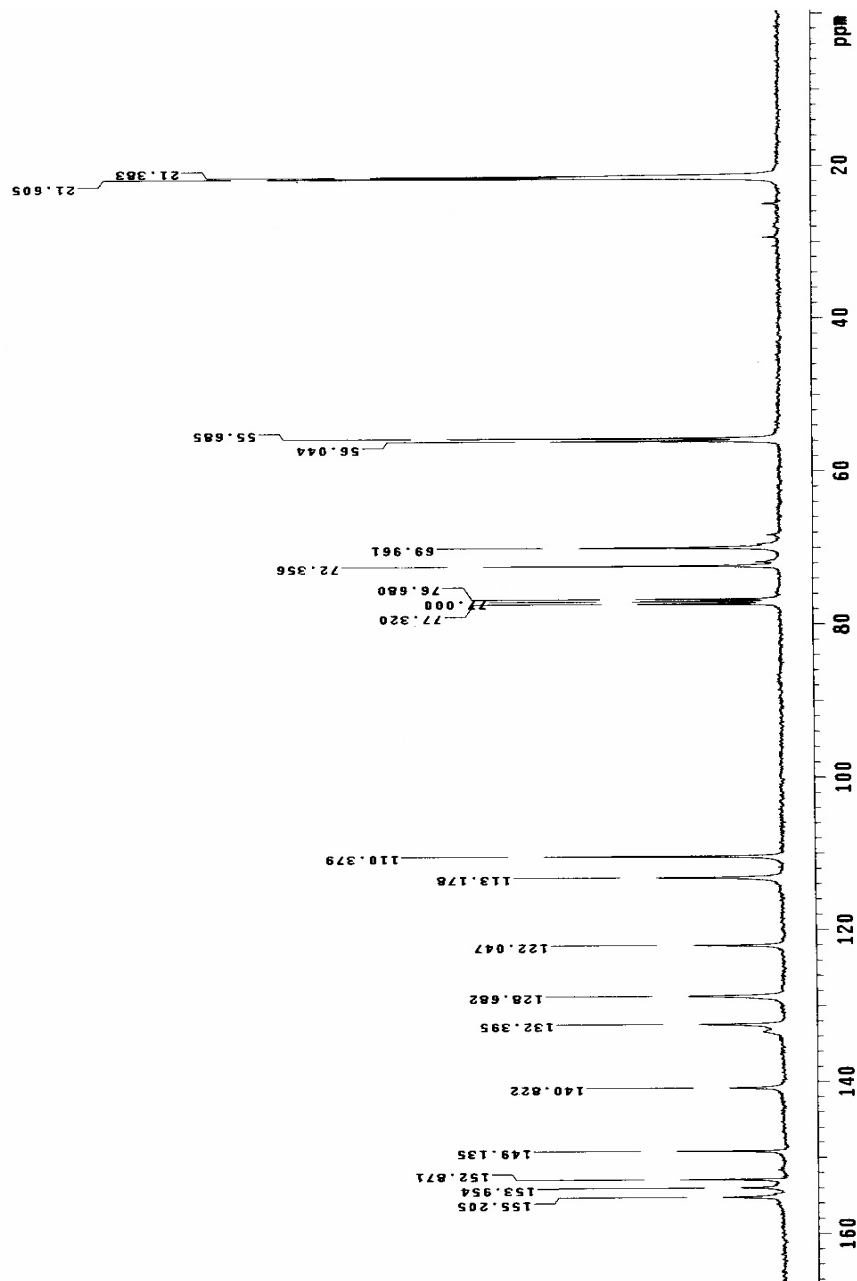

Figure S19. <sup>13</sup>C NMR Spectrum of 3i

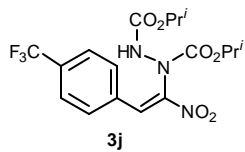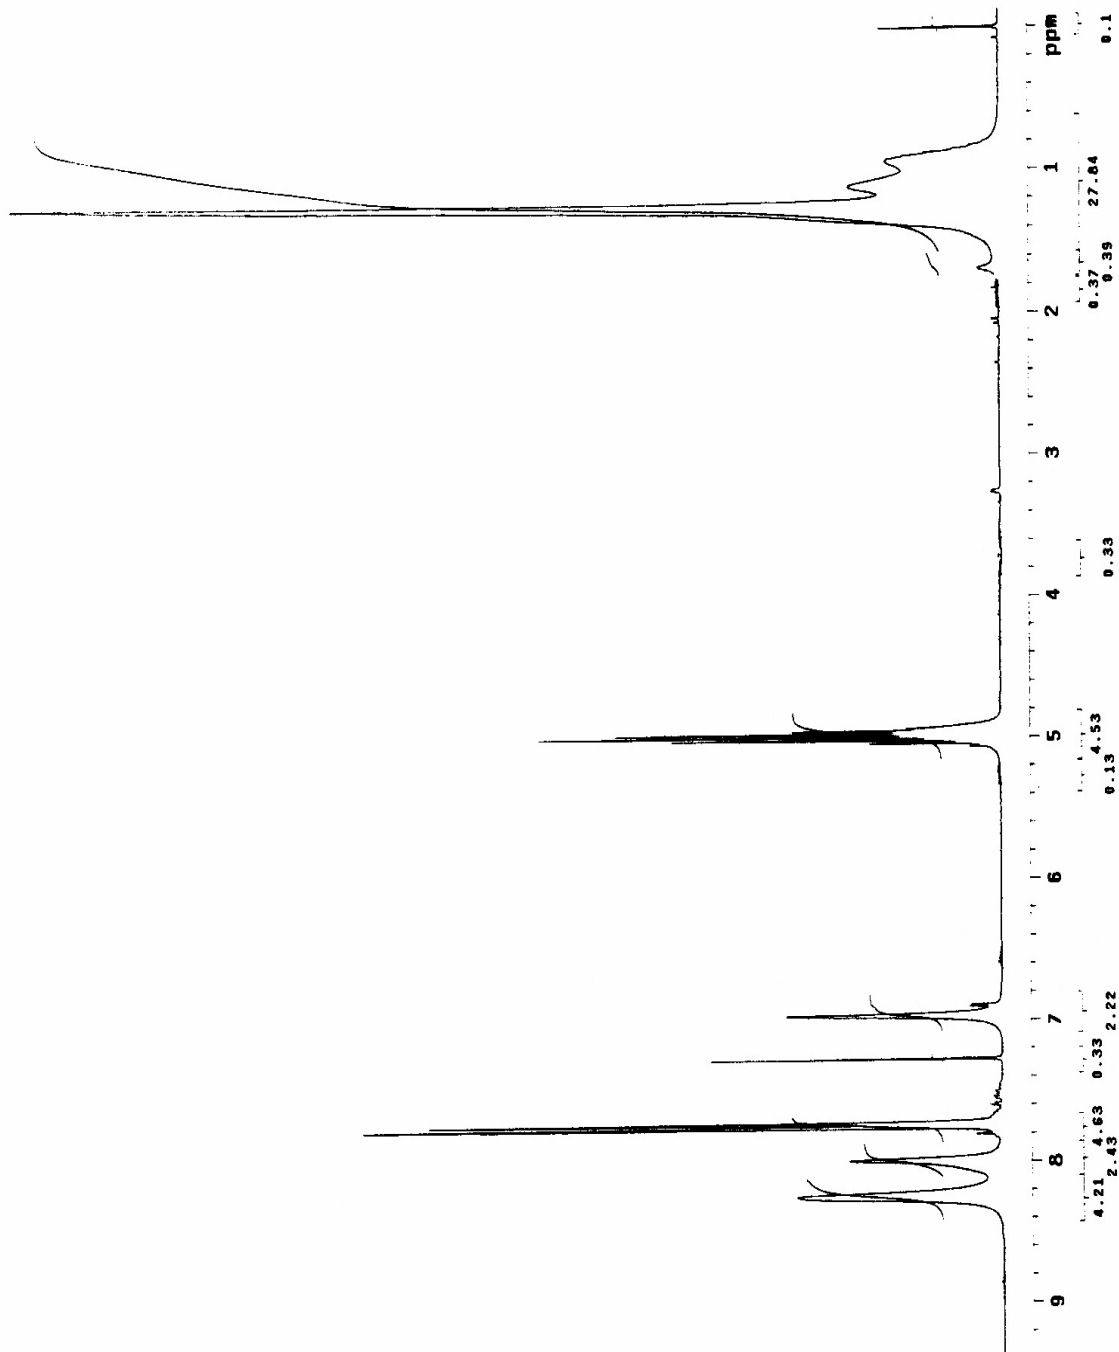

Figure S20. <sup>1</sup>H NMR Spectrum of 3j

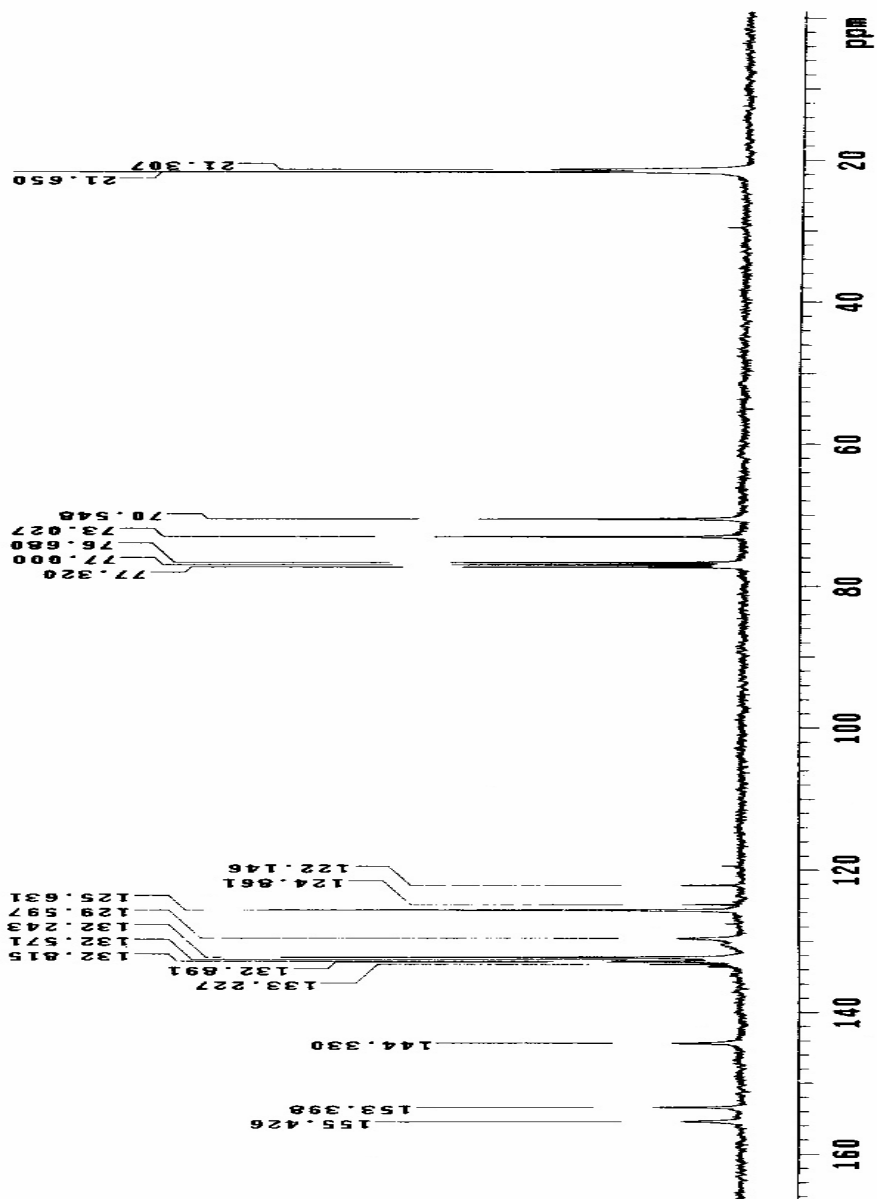

Figure S21. <sup>13</sup>C NMR Spectrum of 3j

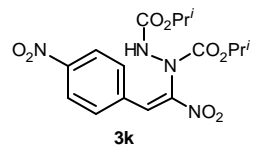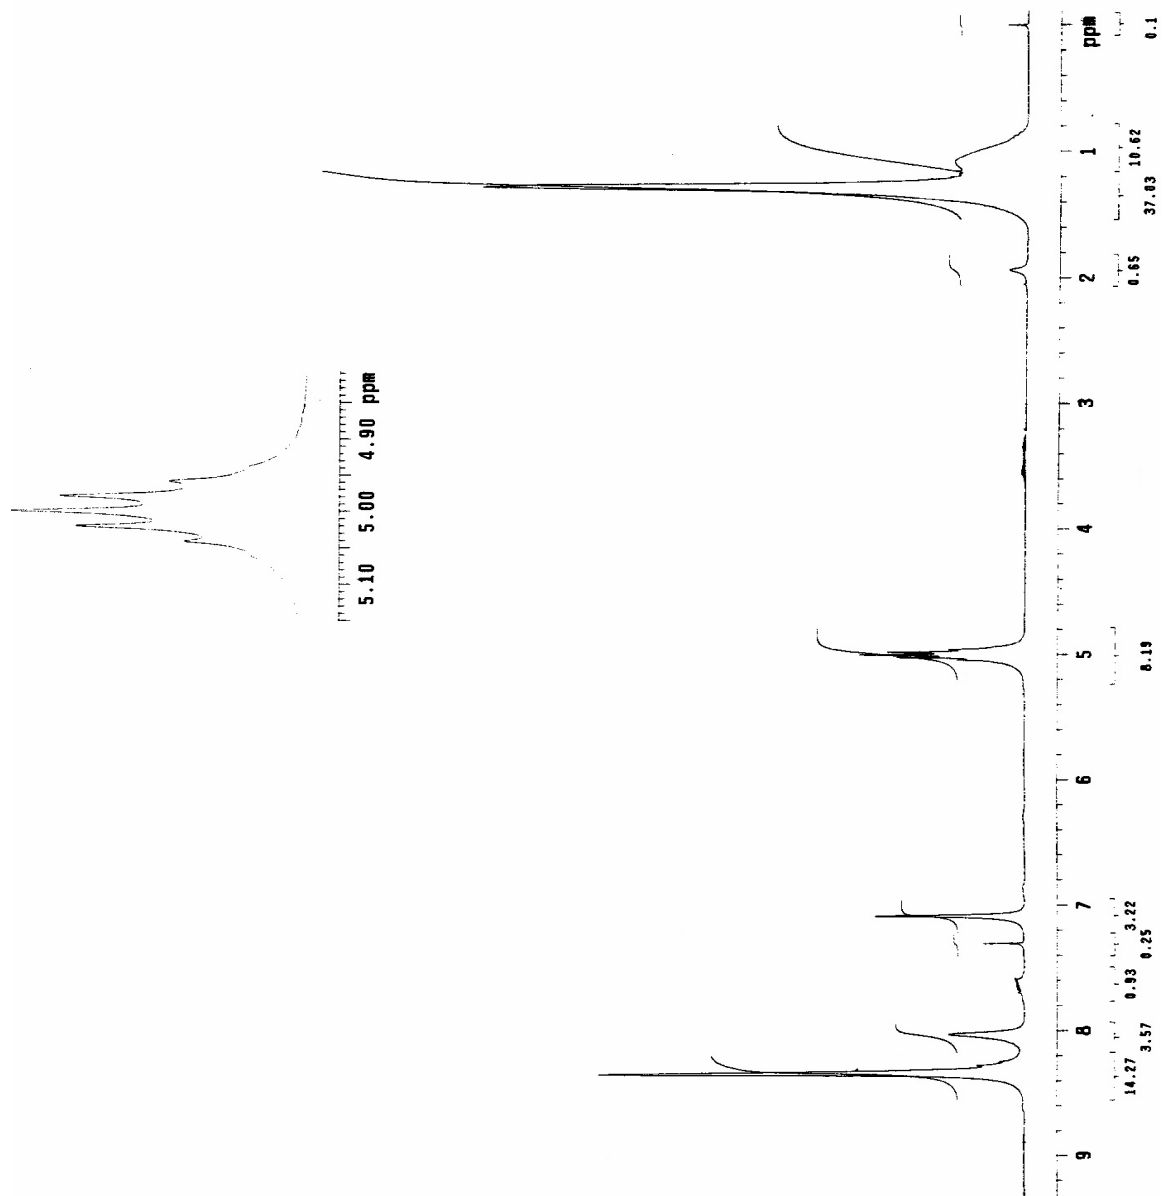

Figure S22. <sup>1</sup>H NMR Spectrum of 3k



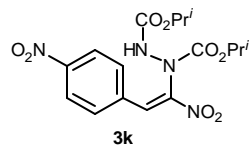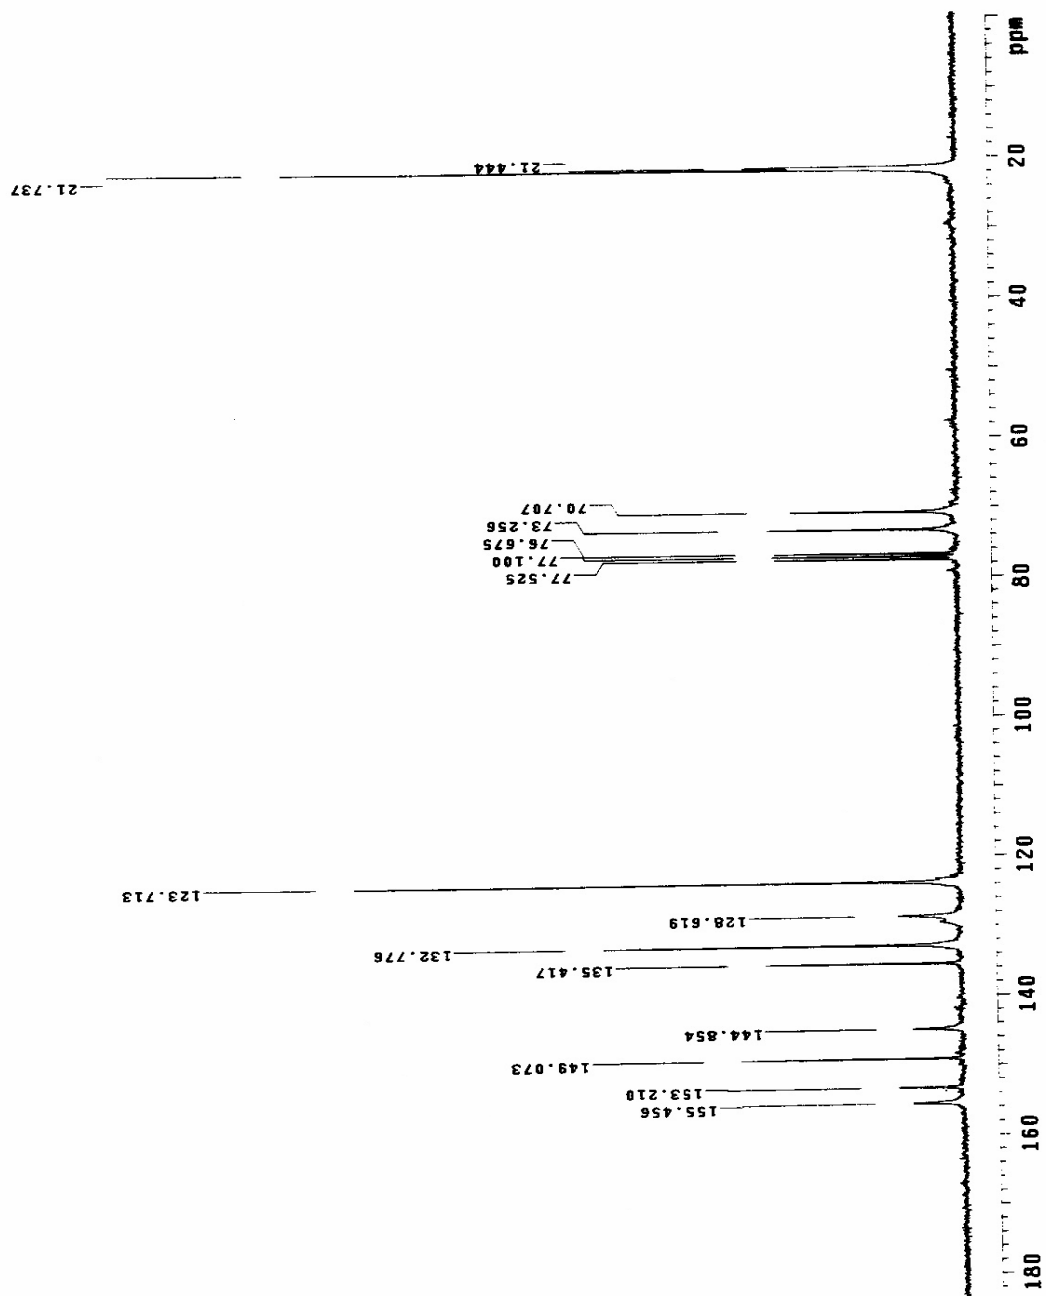

Figure S23. <sup>13</sup>C NMR Spectrum of 3k

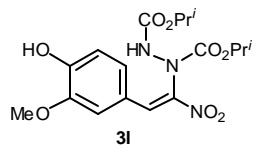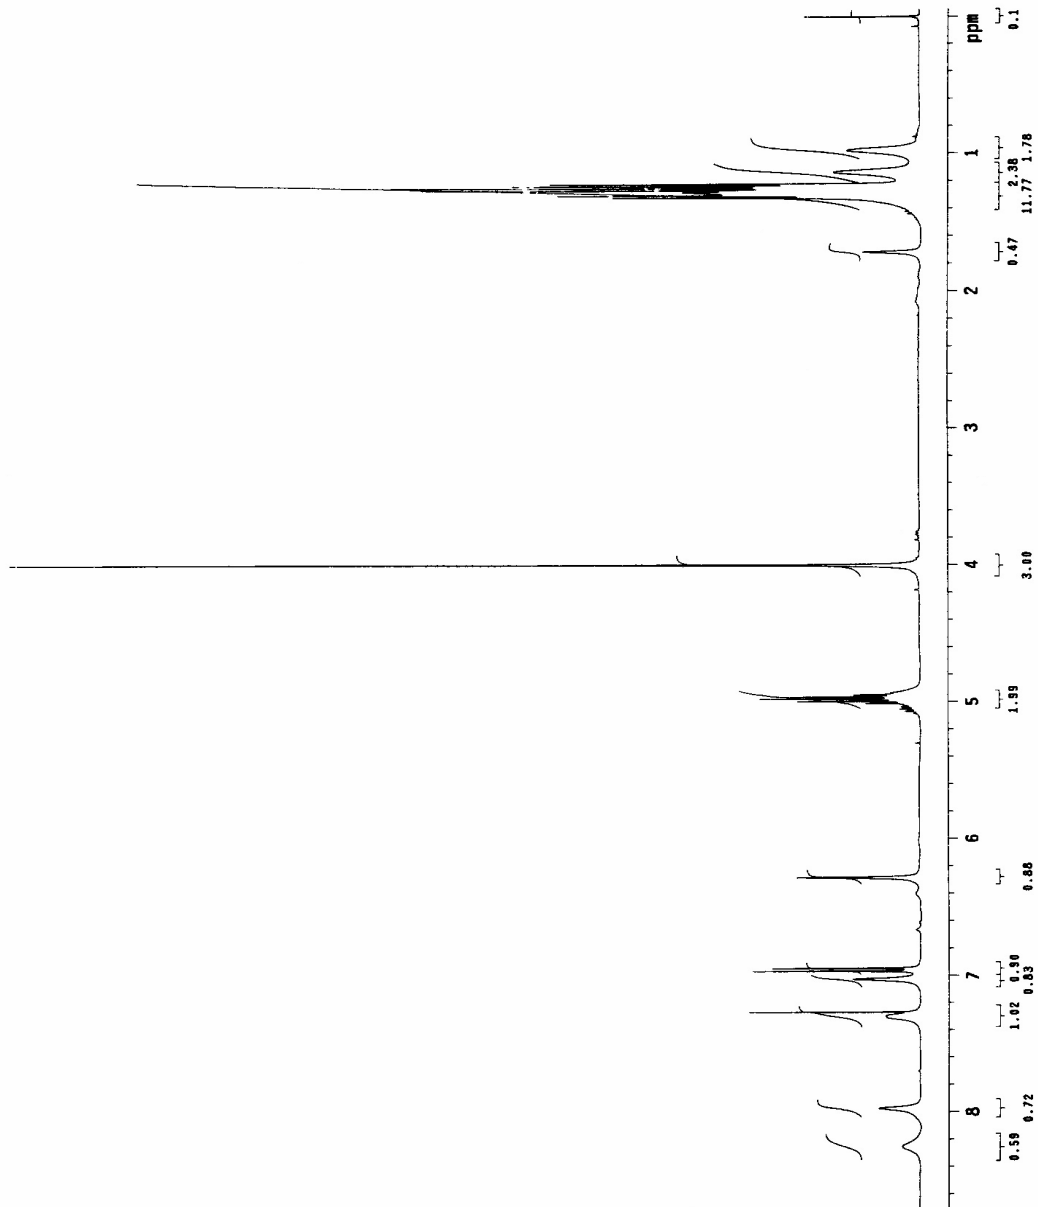

Figure S24. <sup>1</sup>H NMR Spectrum of 31

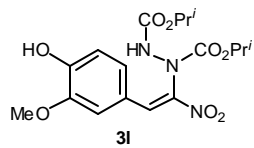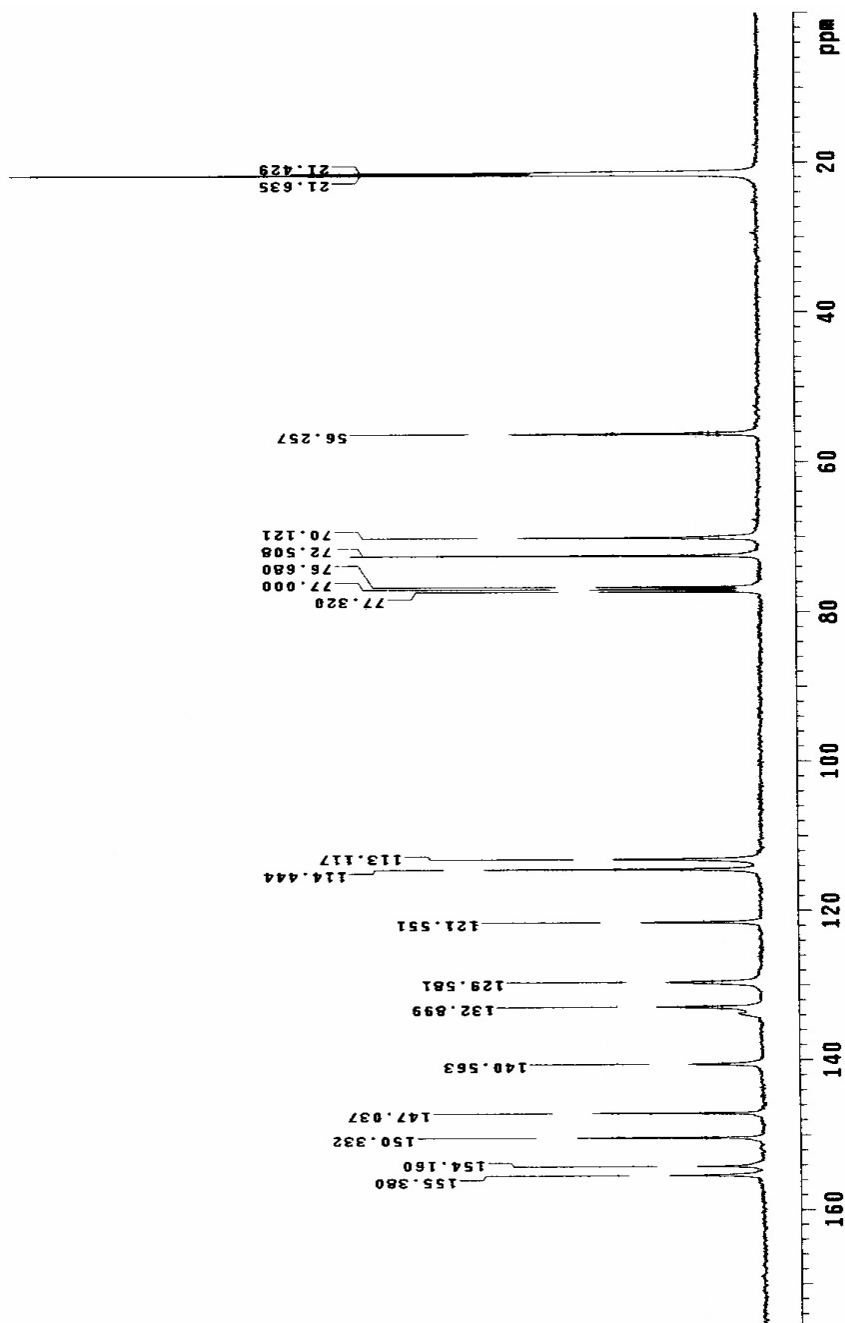

Figure S25.  $^{13}\text{C}$  NMR Spectrum of 31

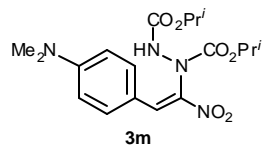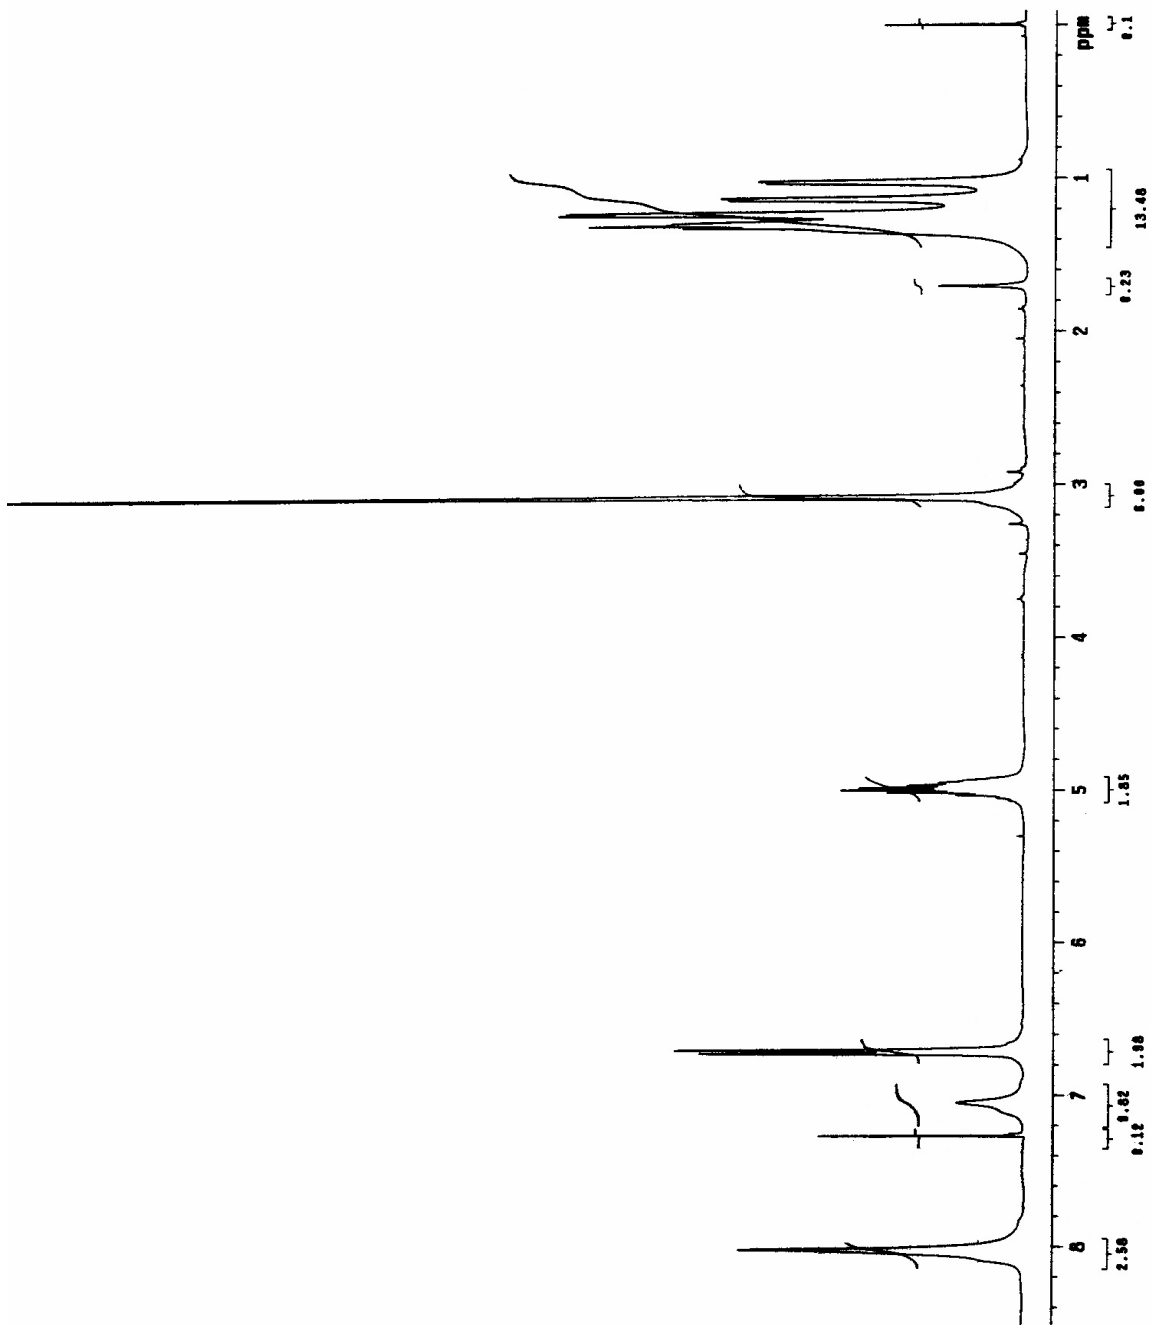

**Figure S26.** <sup>1</sup>H NMR Spectrum of **3m**

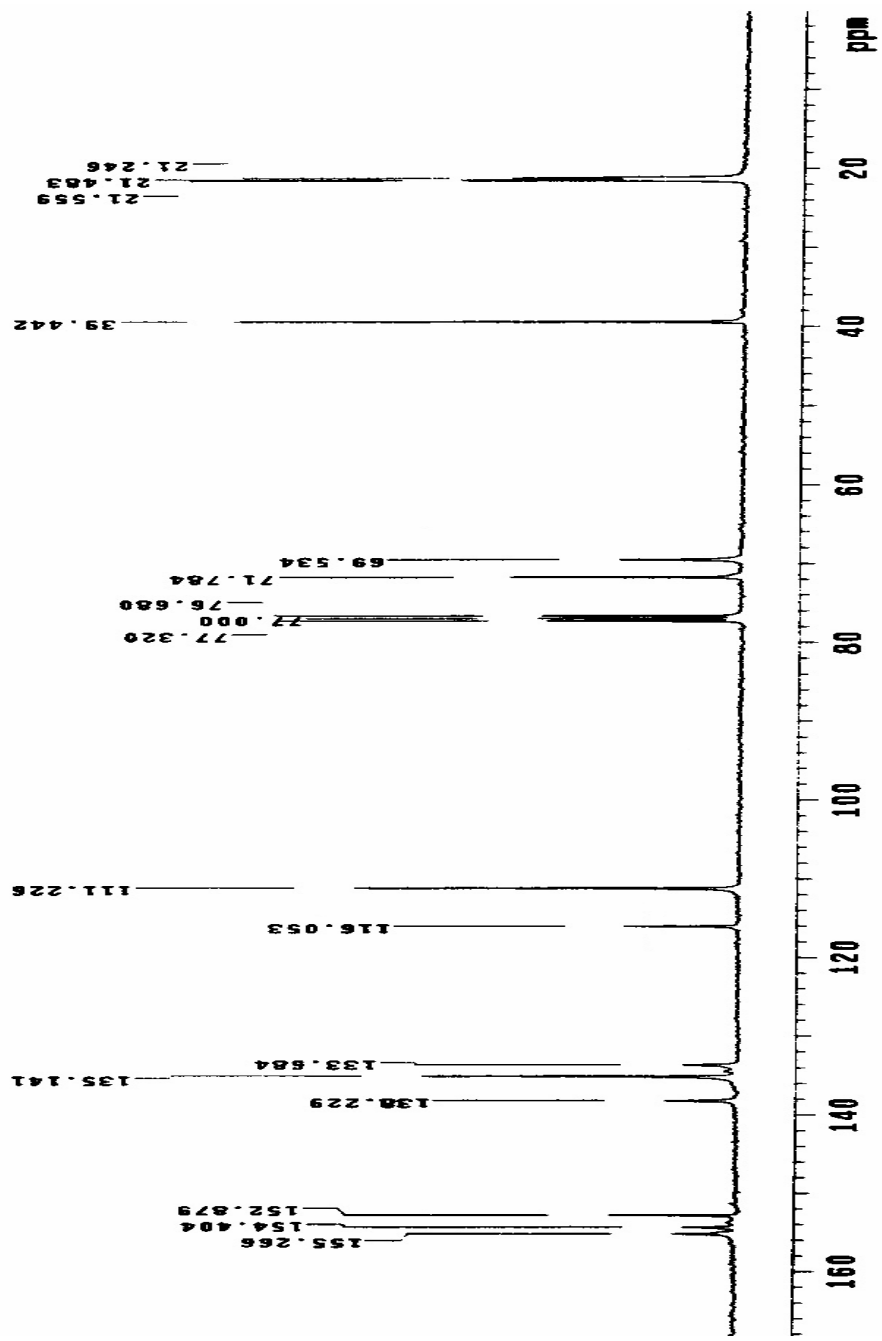

Figure S27. <sup>13</sup>C NMR Spectrum of 3m

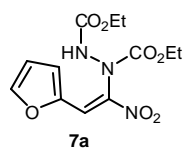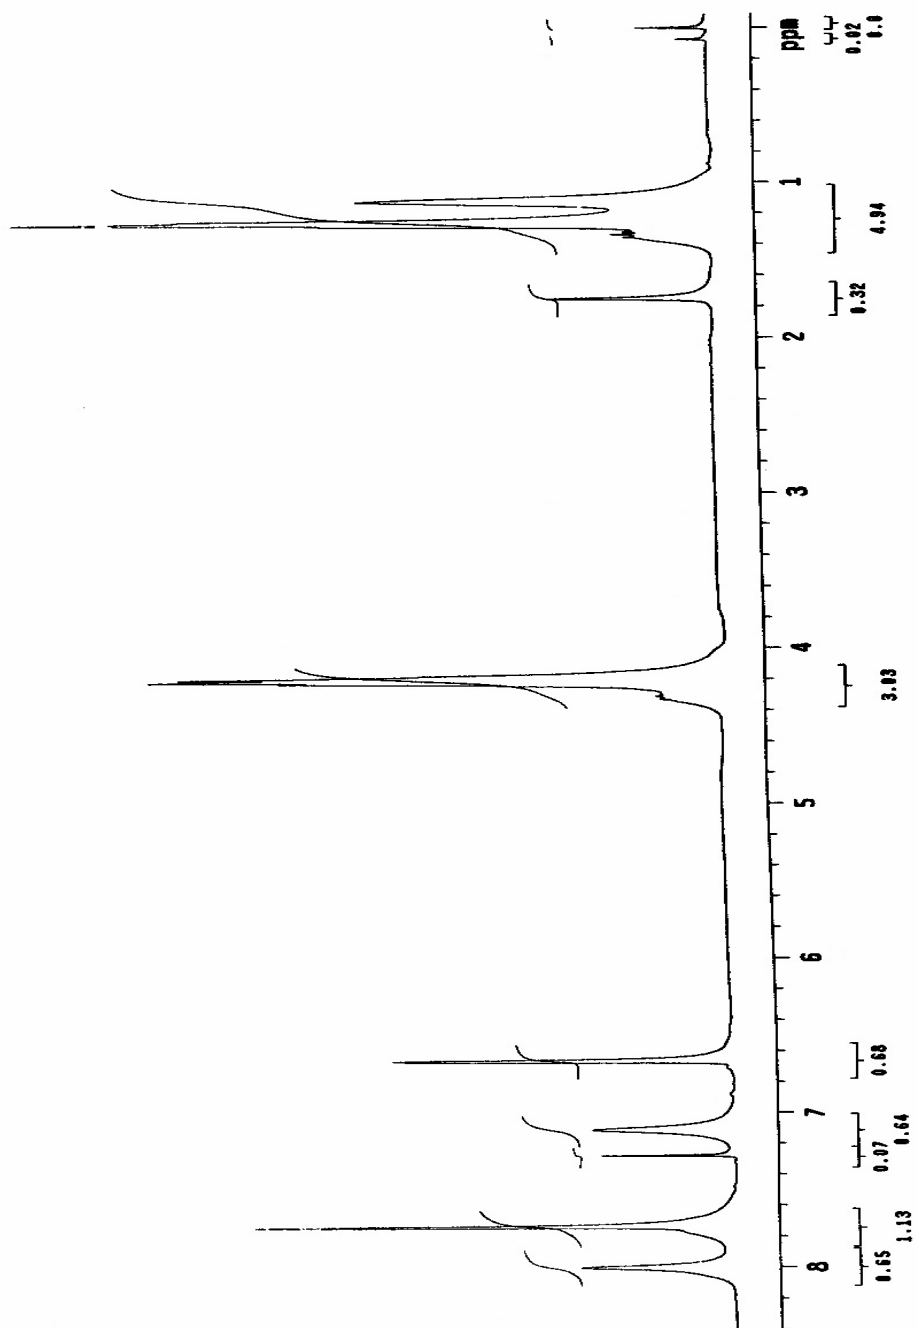

Figure S28. <sup>1</sup>H NMR Spectrum of 7a

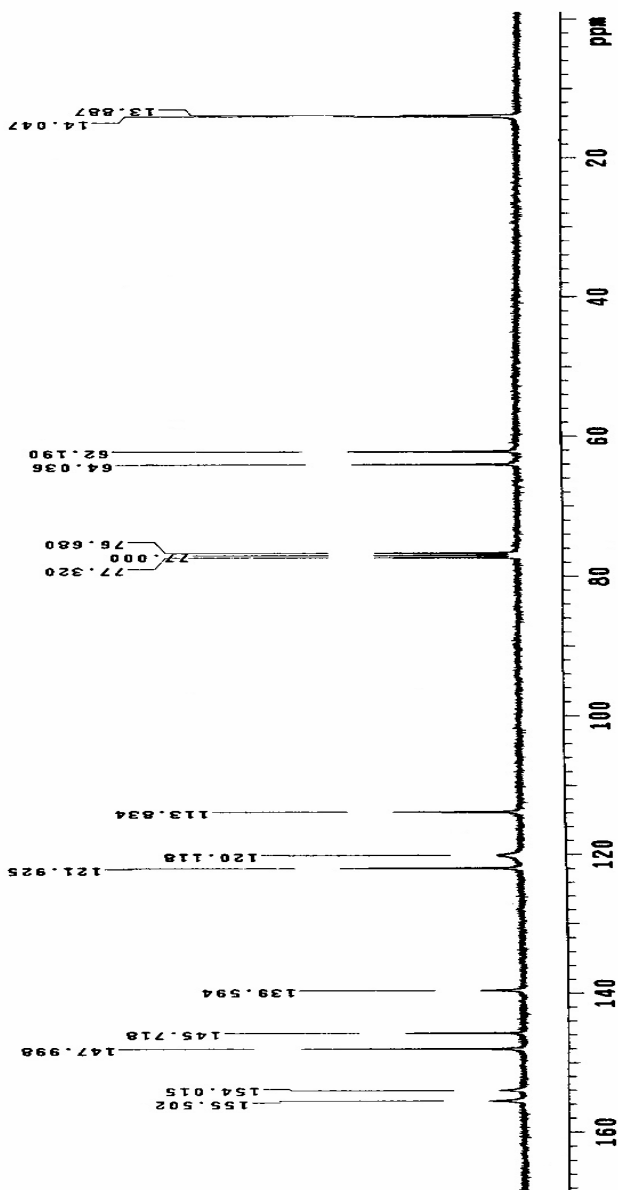

Figure S29.  $^{13}\text{C}$  NMR Spectrum of 7a

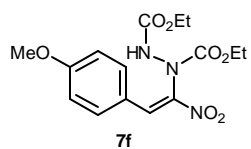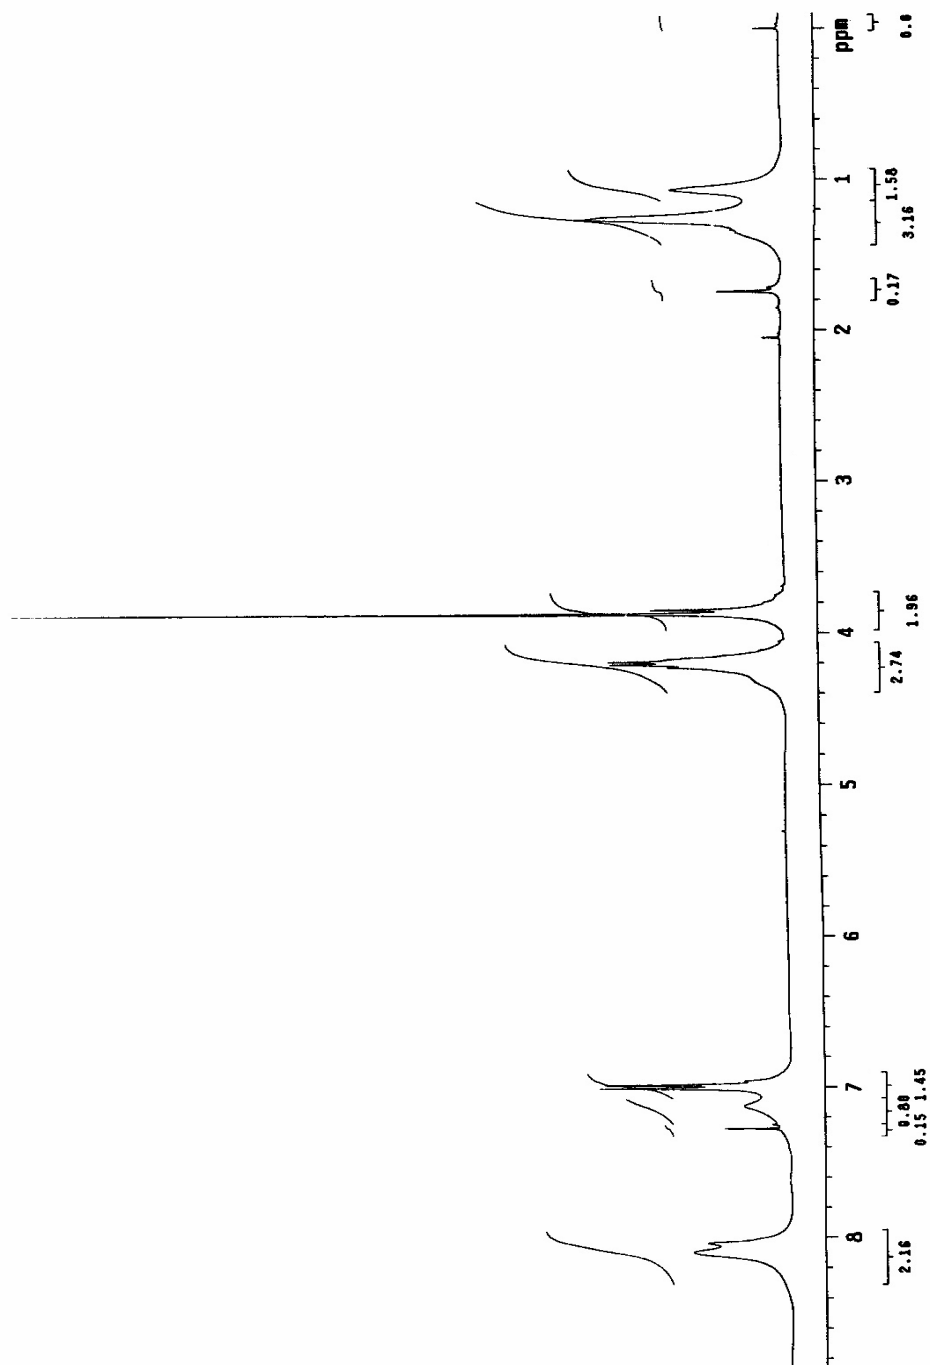

Figure S30. <sup>1</sup>H NMR Spectrum of 7f



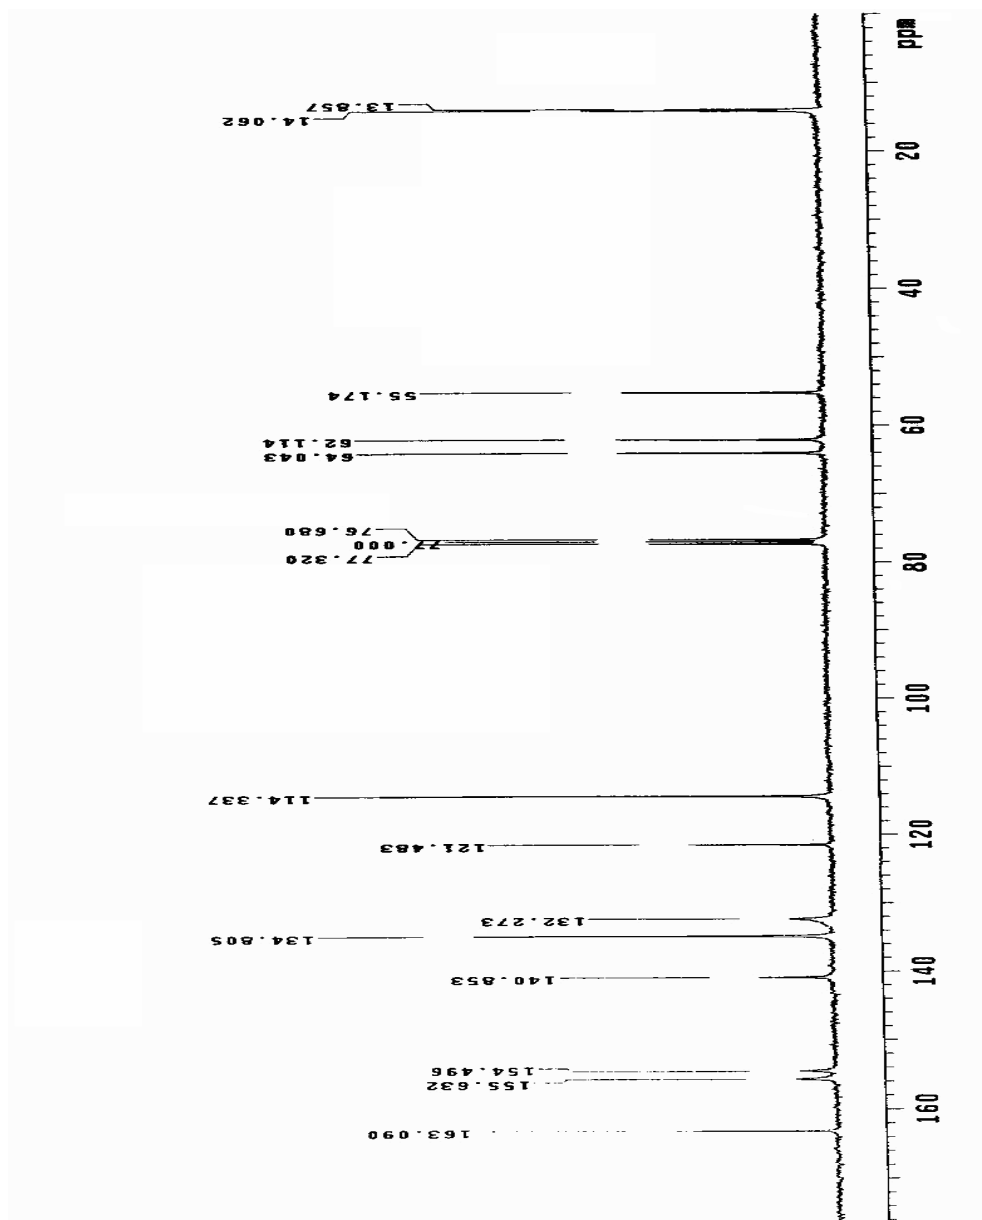

Figure S31. <sup>13</sup>C NMR Spectrum of 7f

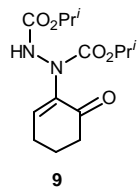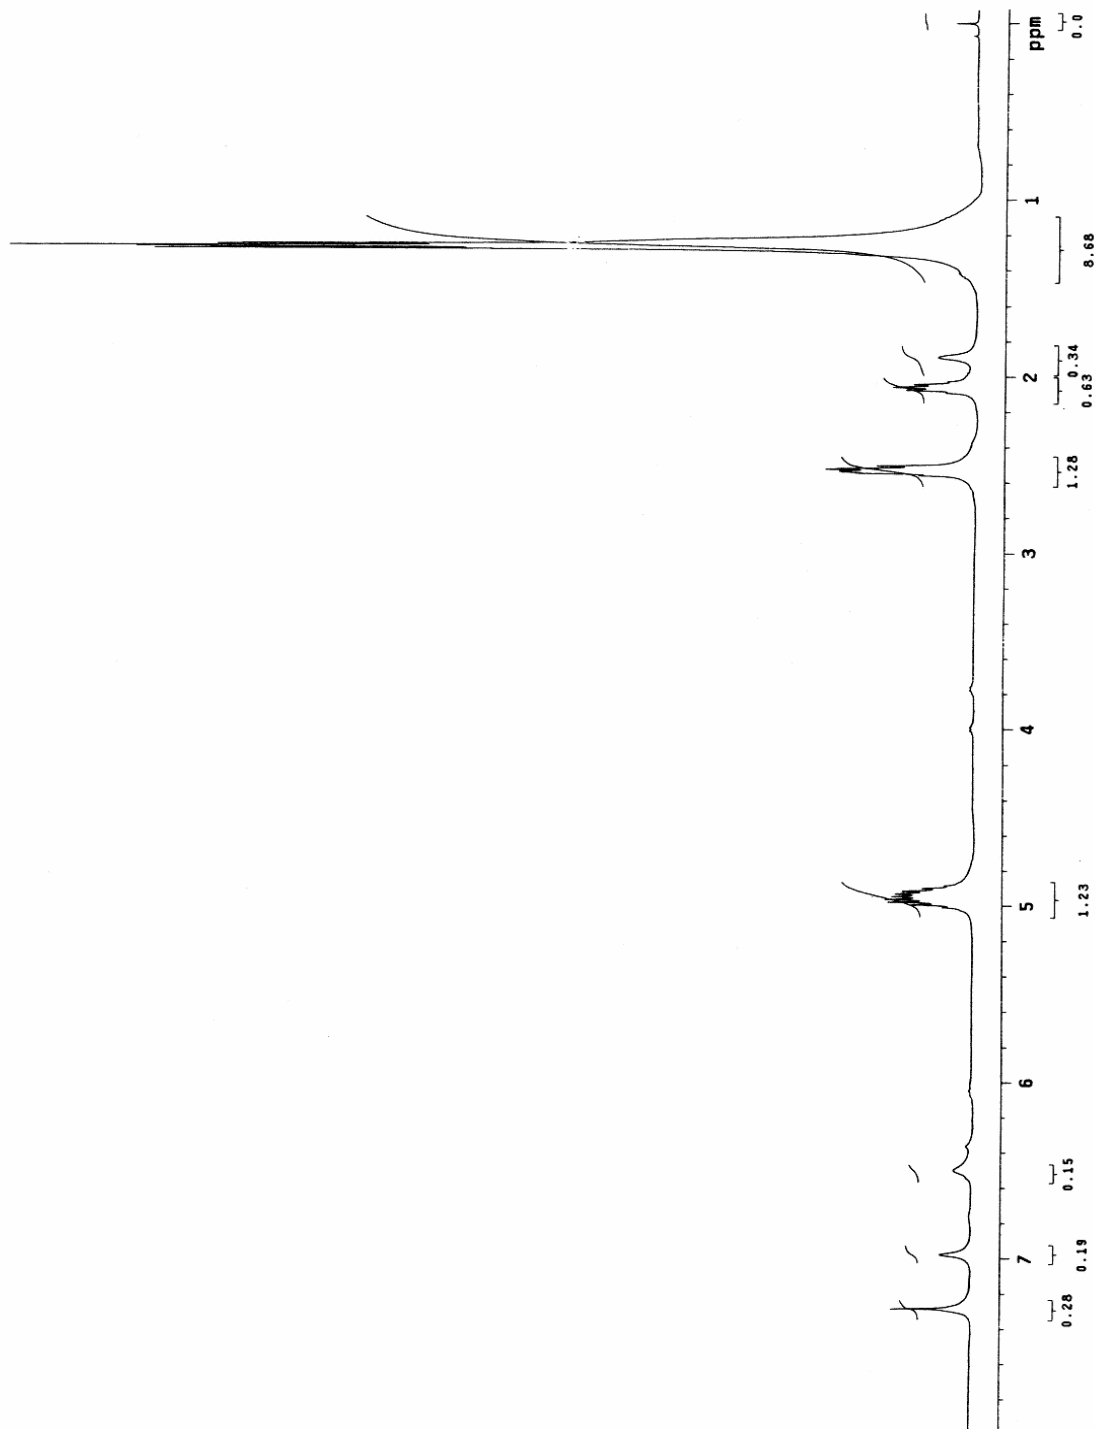

Figure S32. <sup>1</sup>H NMR Spectrum of 9

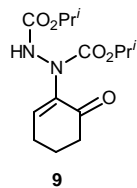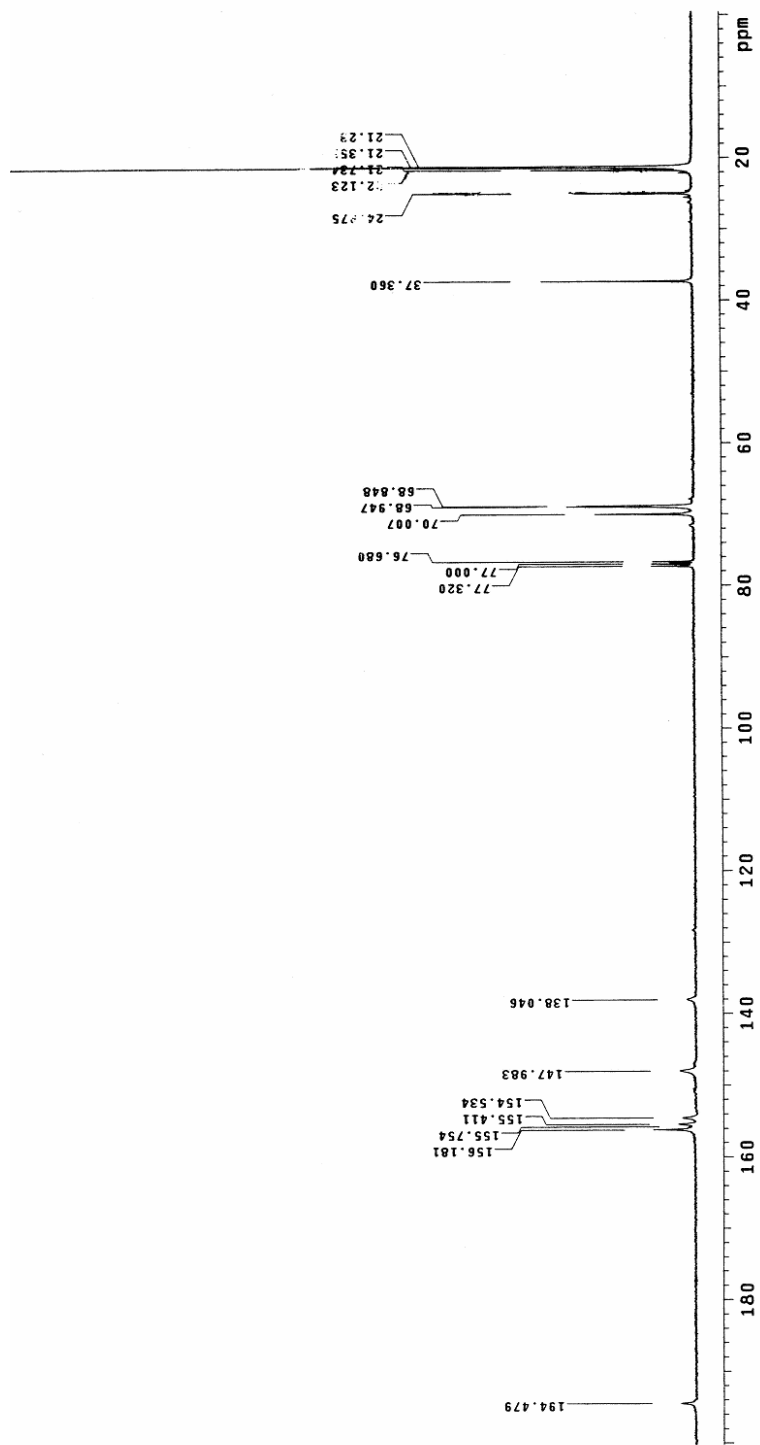

Figure S33. <sup>13</sup>C NMR Spectrum of 9

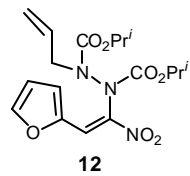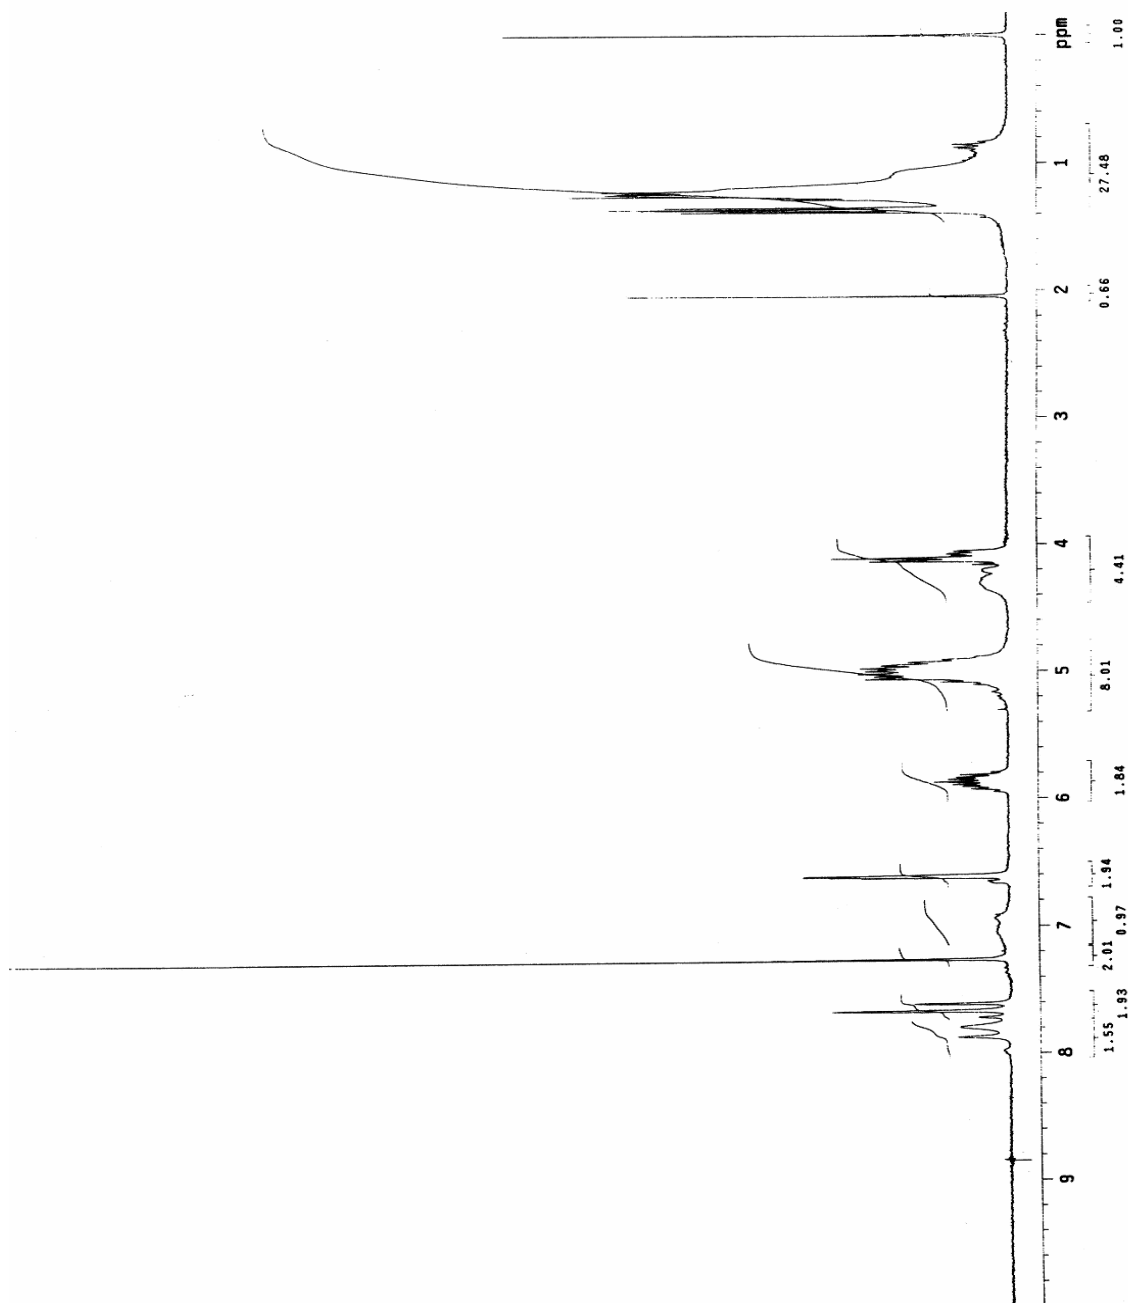

Figure S34. <sup>1</sup>H NMR Spectrum of 12

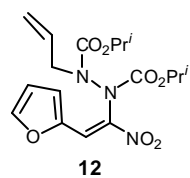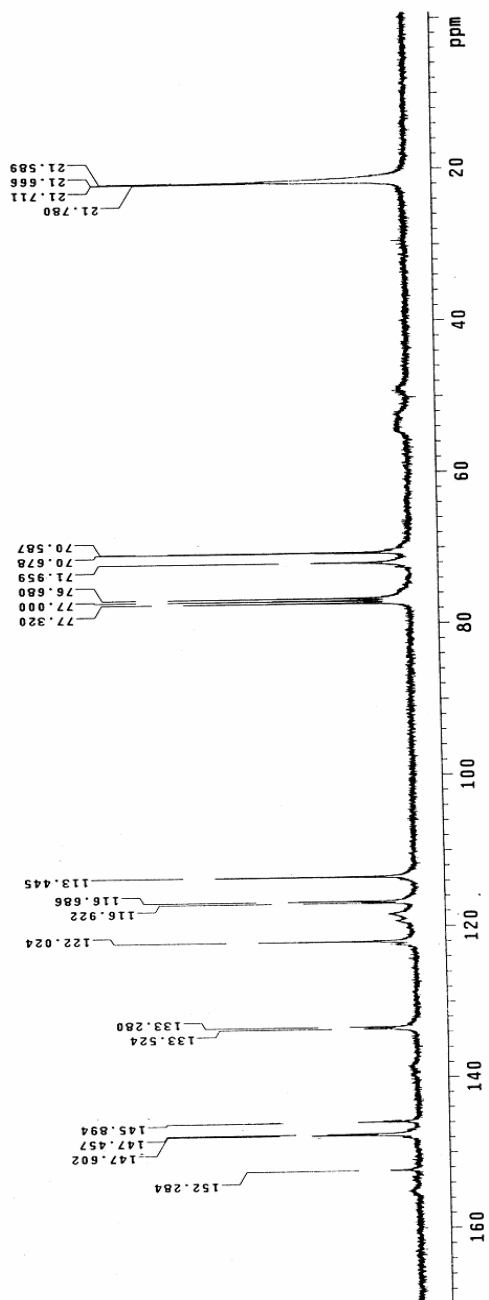

Figure S35. <sup>13</sup>C NMR Spectrum of 12

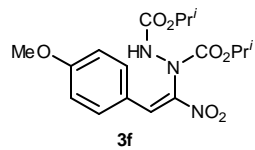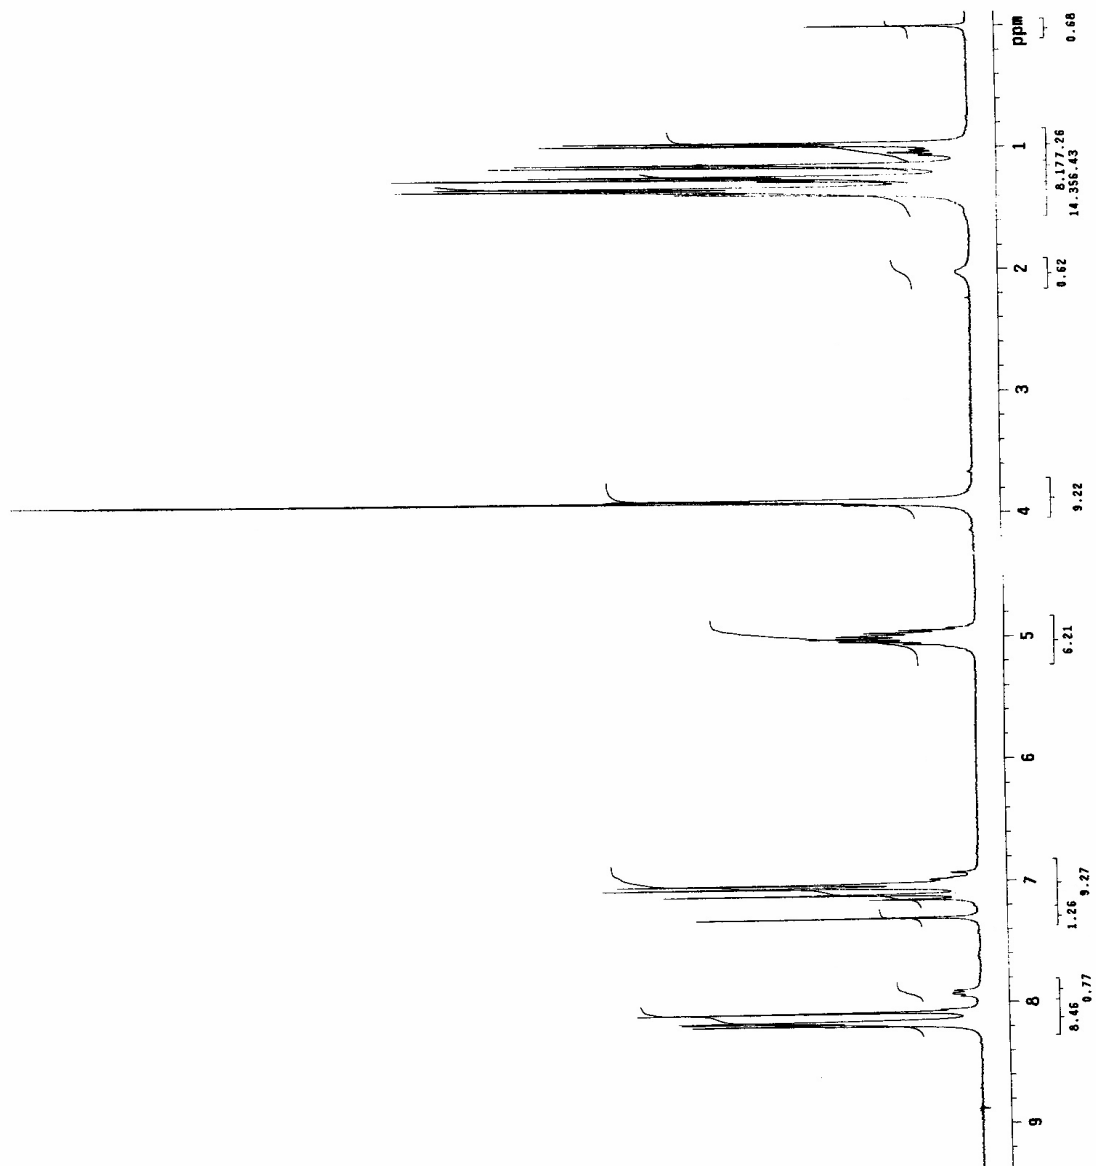

Figure S36. <sup>1</sup>H NMR Spectrum of 3f (-40 °C)

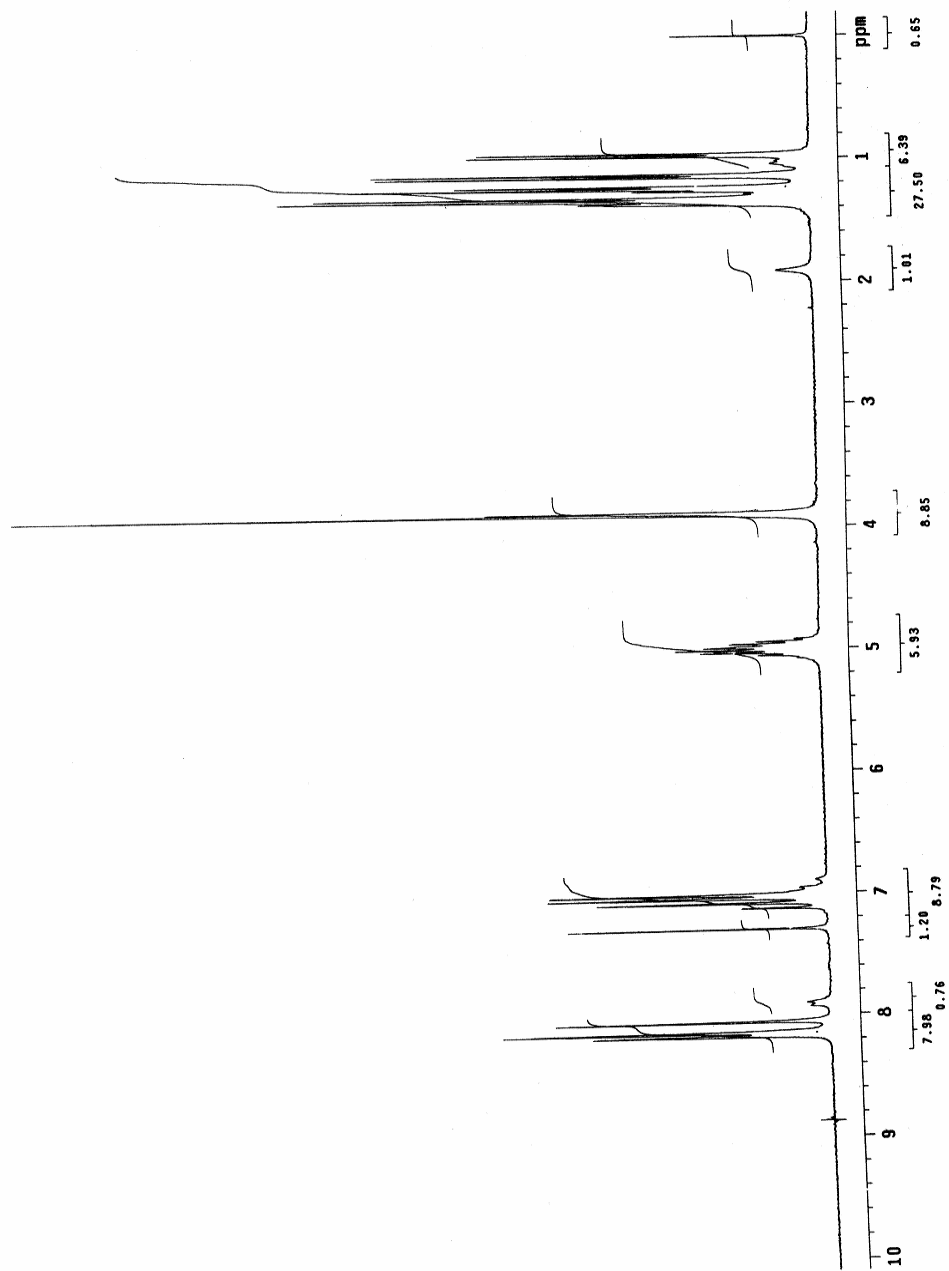

Figure S37. <sup>1</sup>H NMR Spectrum of 3f (-25 °C)

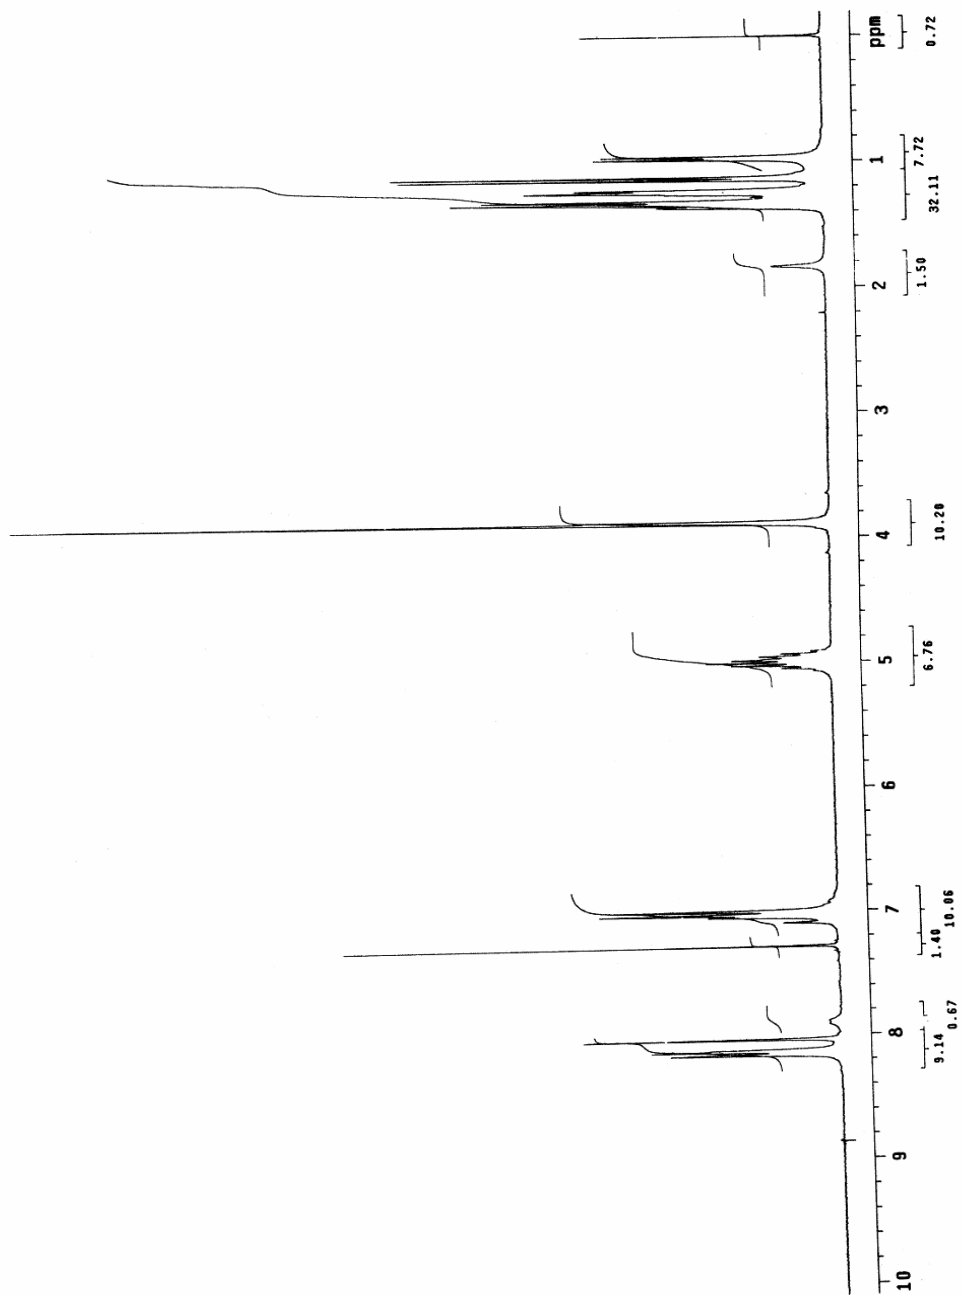

Figure S38.  $^1\text{H}$  NMR Spectrum of **3f** (-10 °C)



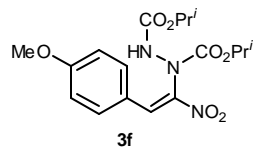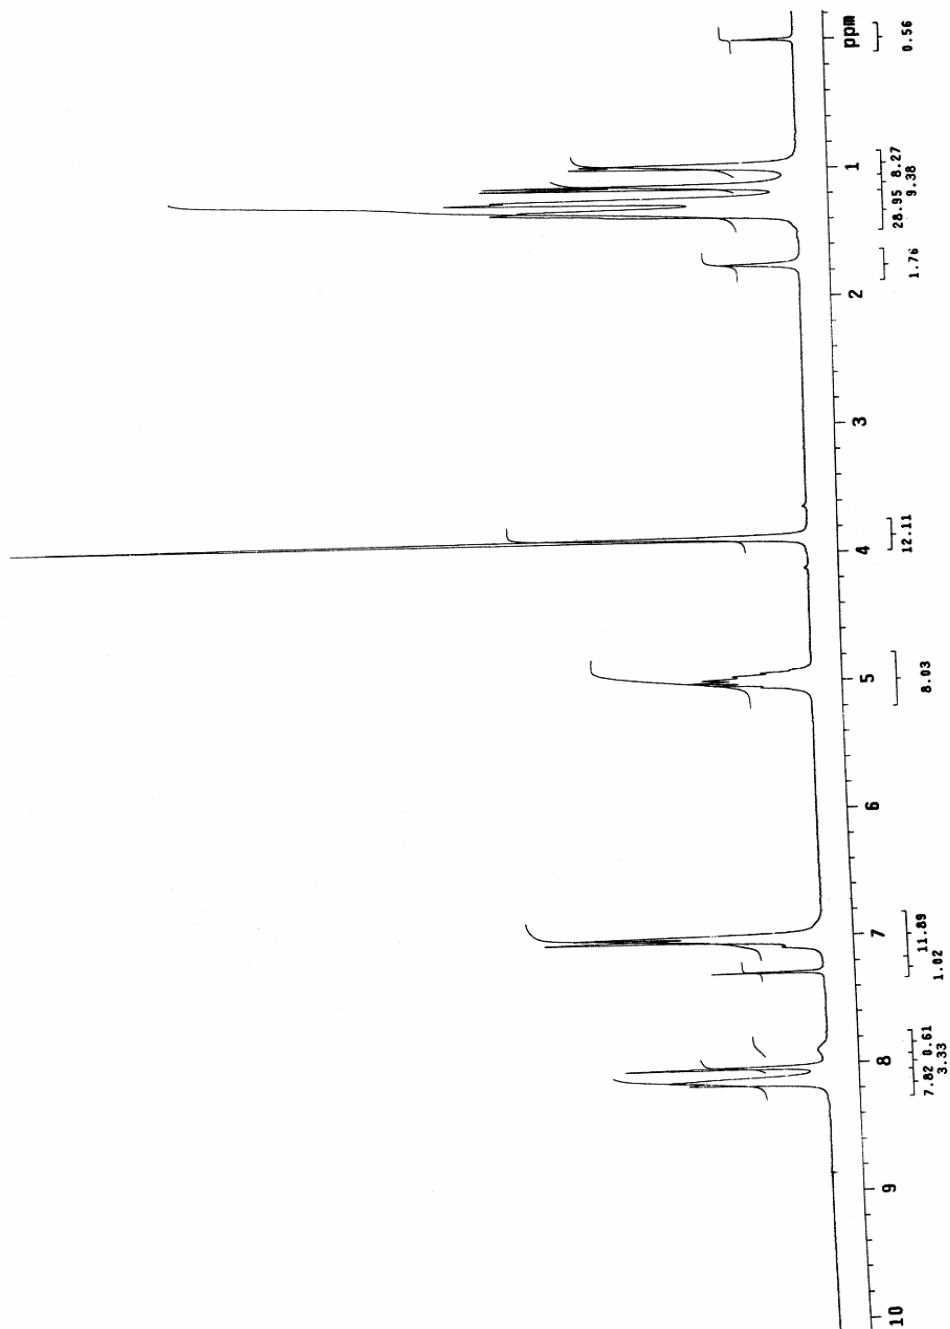

Figure S39. <sup>1</sup>H NMR Spectrum of 3f (0 °C)

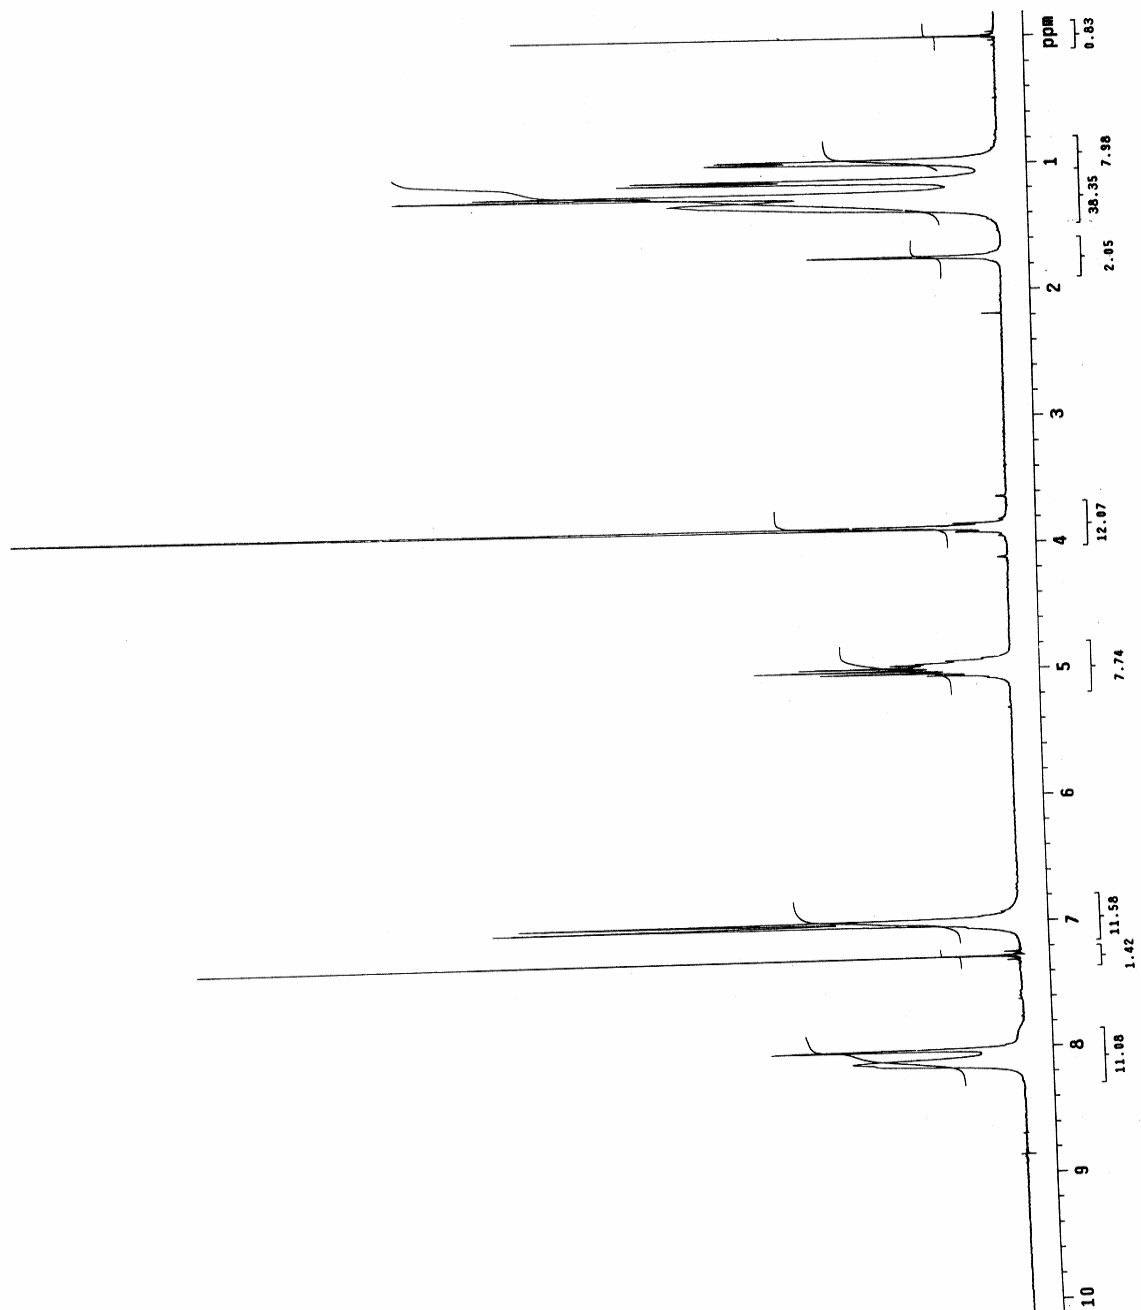

Figure S40. <sup>1</sup>H NMR Spectrum of 3f (10 °C)

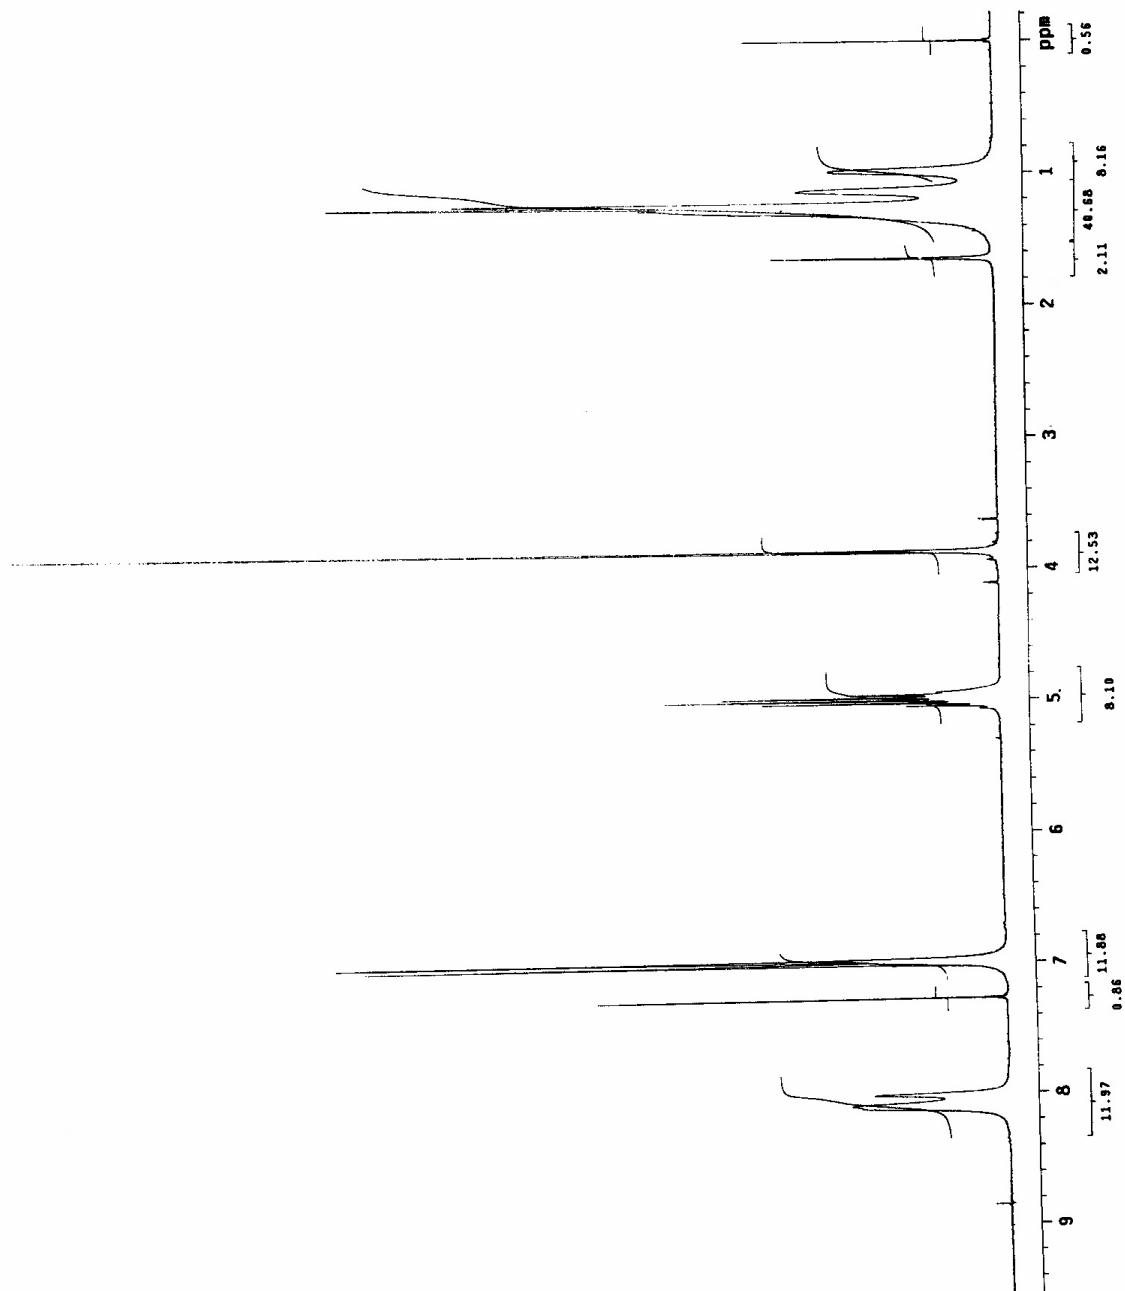

Figure S41. <sup>1</sup>H NMR Spectrum of 3f (rt, +25 °C)

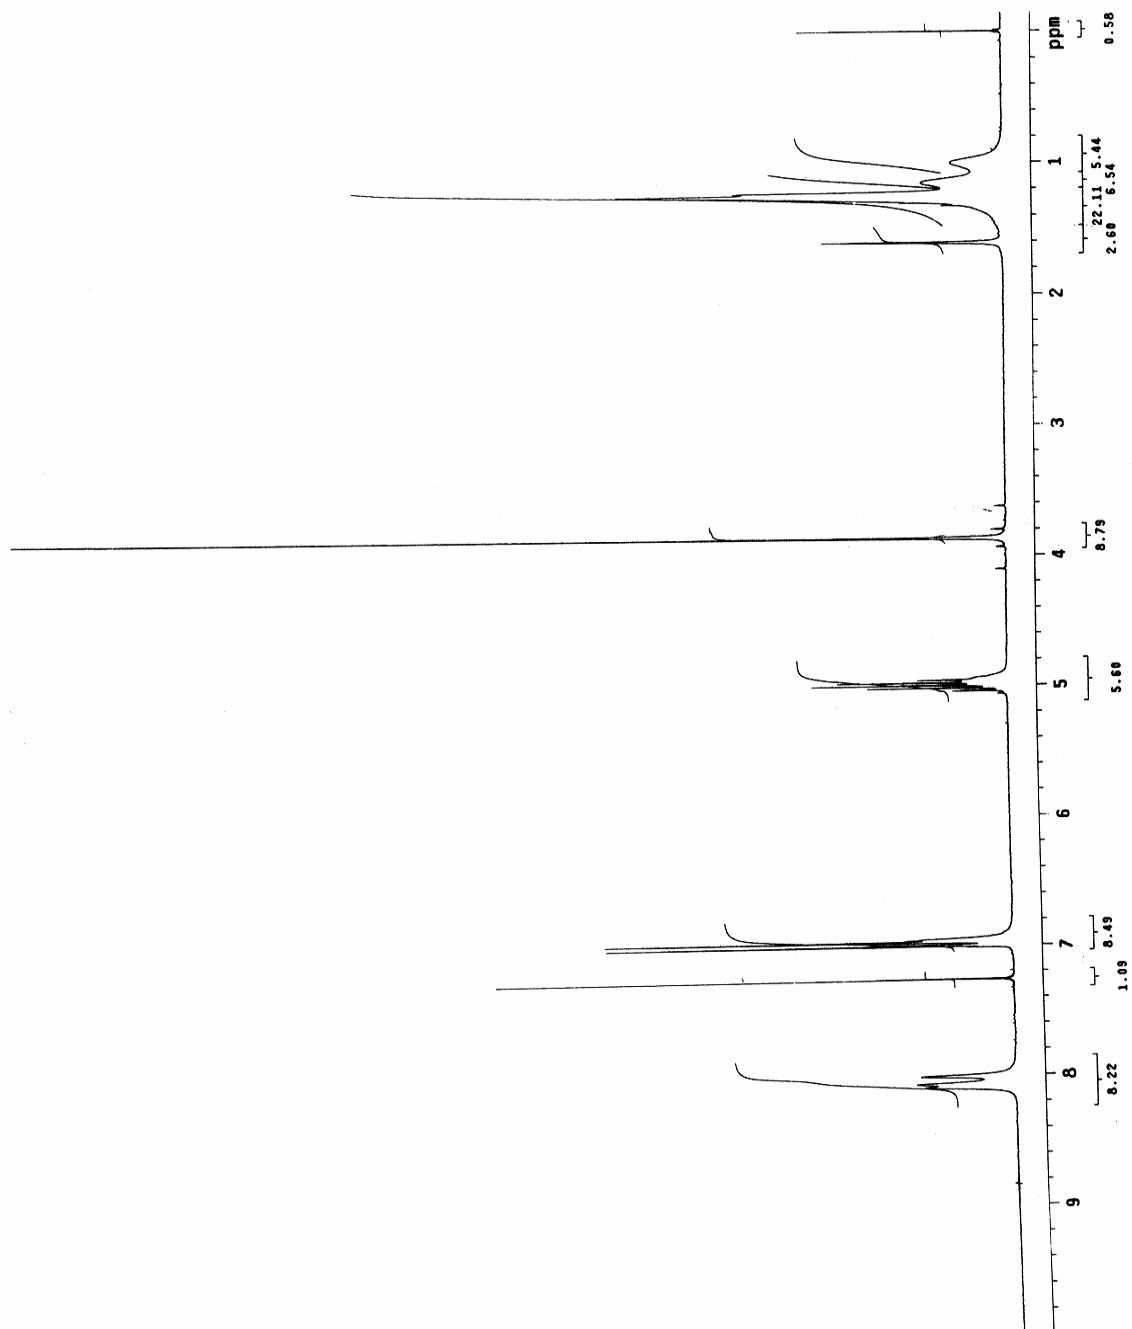

Figure S42. <sup>1</sup>H NMR Spectrum of 3f (rt, +35 °C)

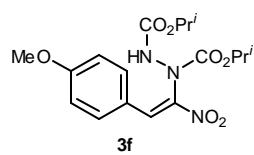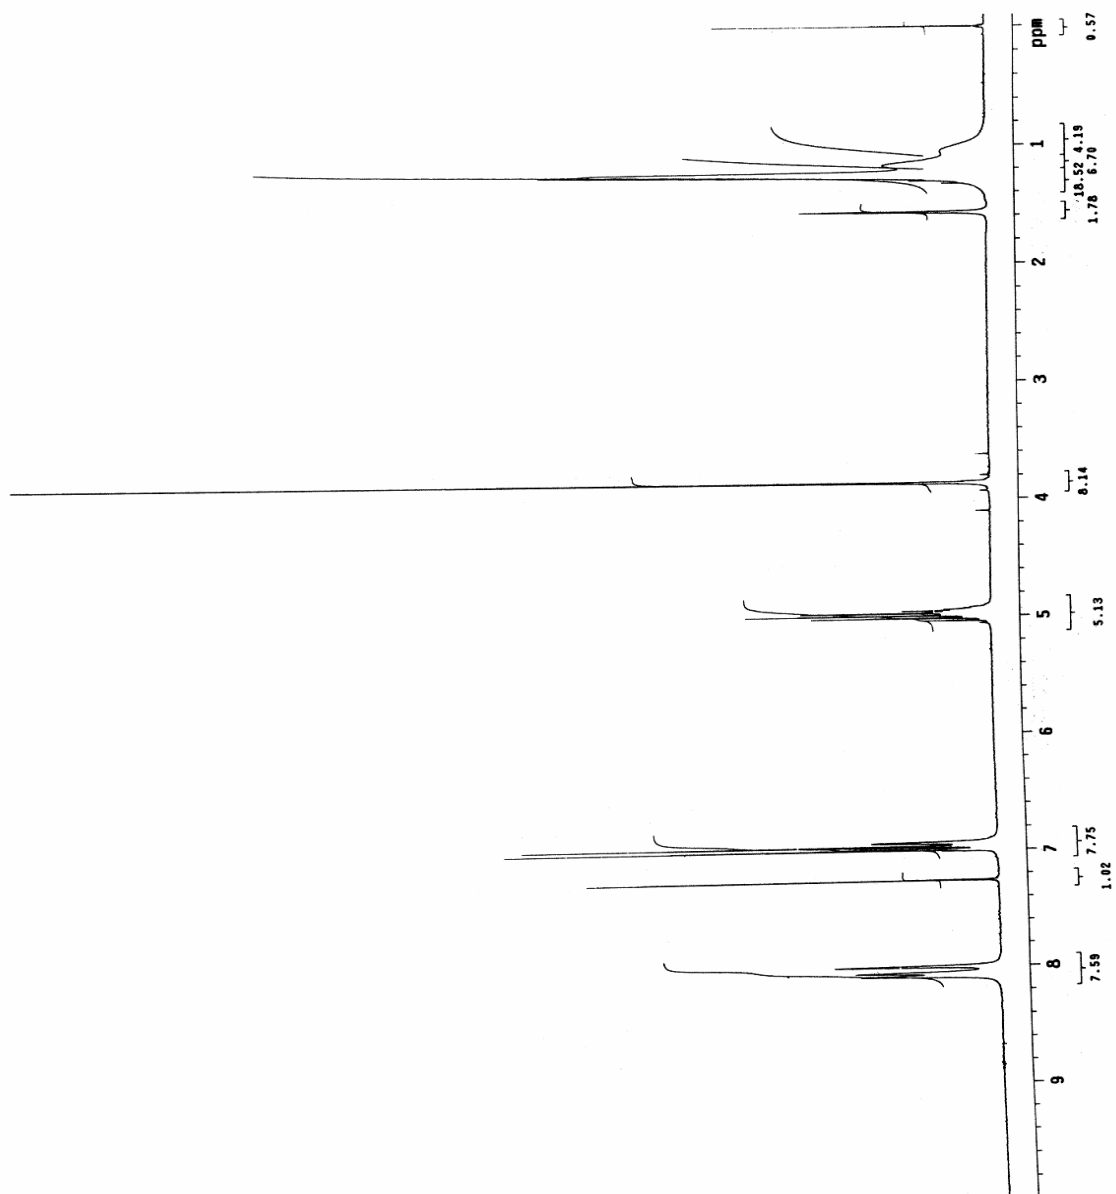

Figure S43. <sup>1</sup>H NMR Spectrum of 3f (+45 °C)

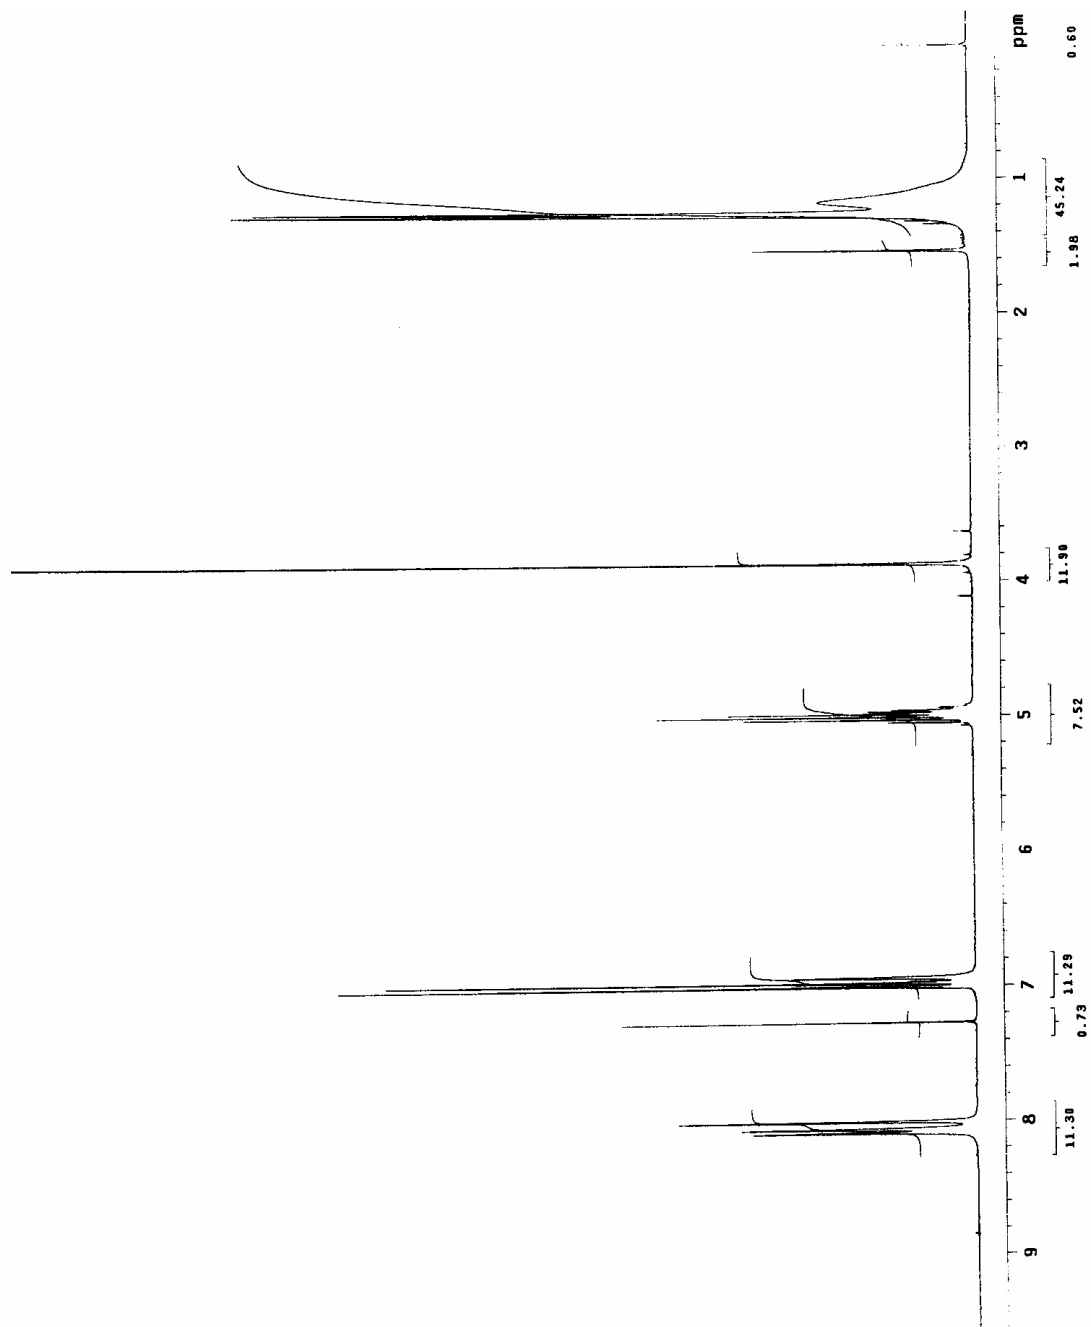

Figure S44. <sup>1</sup>H NMR Spectrum of 3f (+55 °C)
